# Supplementary material for: Spatial- and Fourier-domain ptychography for high-throughput bio-imaging
Source: Springer Nature journal article supplement (doi:10.1038/s41596-023-00829-4), 2023-05-29

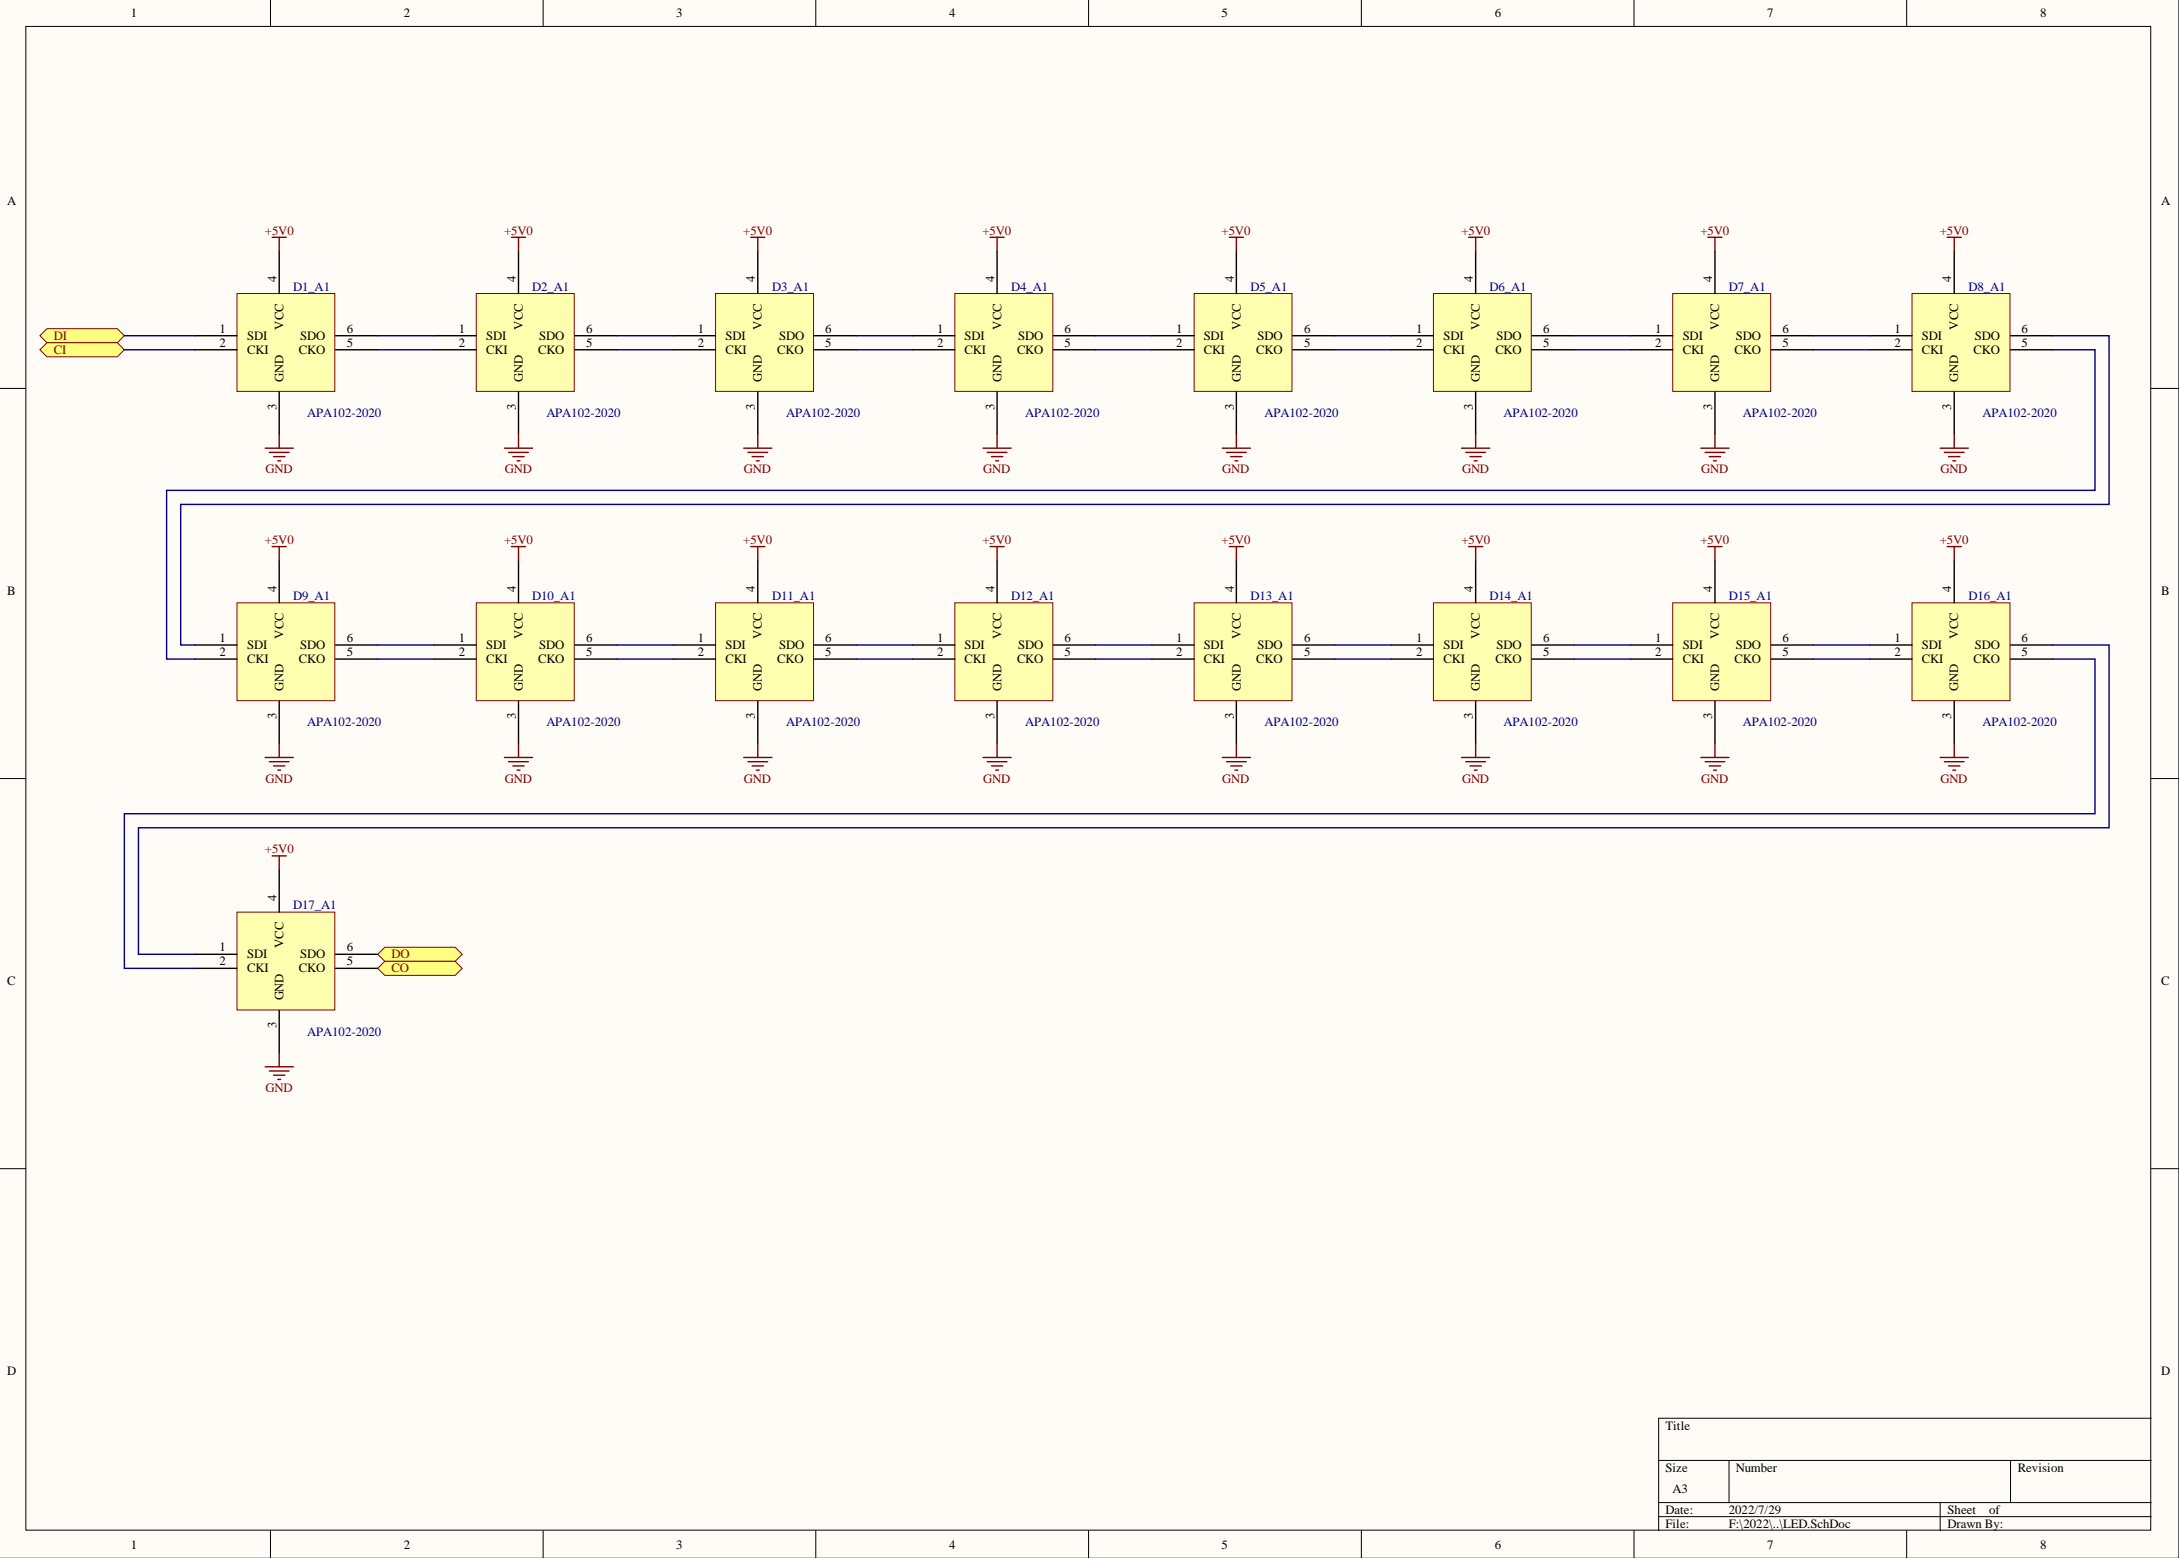

| Title |                        |           |
|-------|------------------------|-----------|
| Size  | Number                 | Revision  |
| A3    |                        |           |
| Date: | 2022/7/29              | Sheet of  |
| File: | F:\2022\...\LED.SchDoc | Drawn By: |

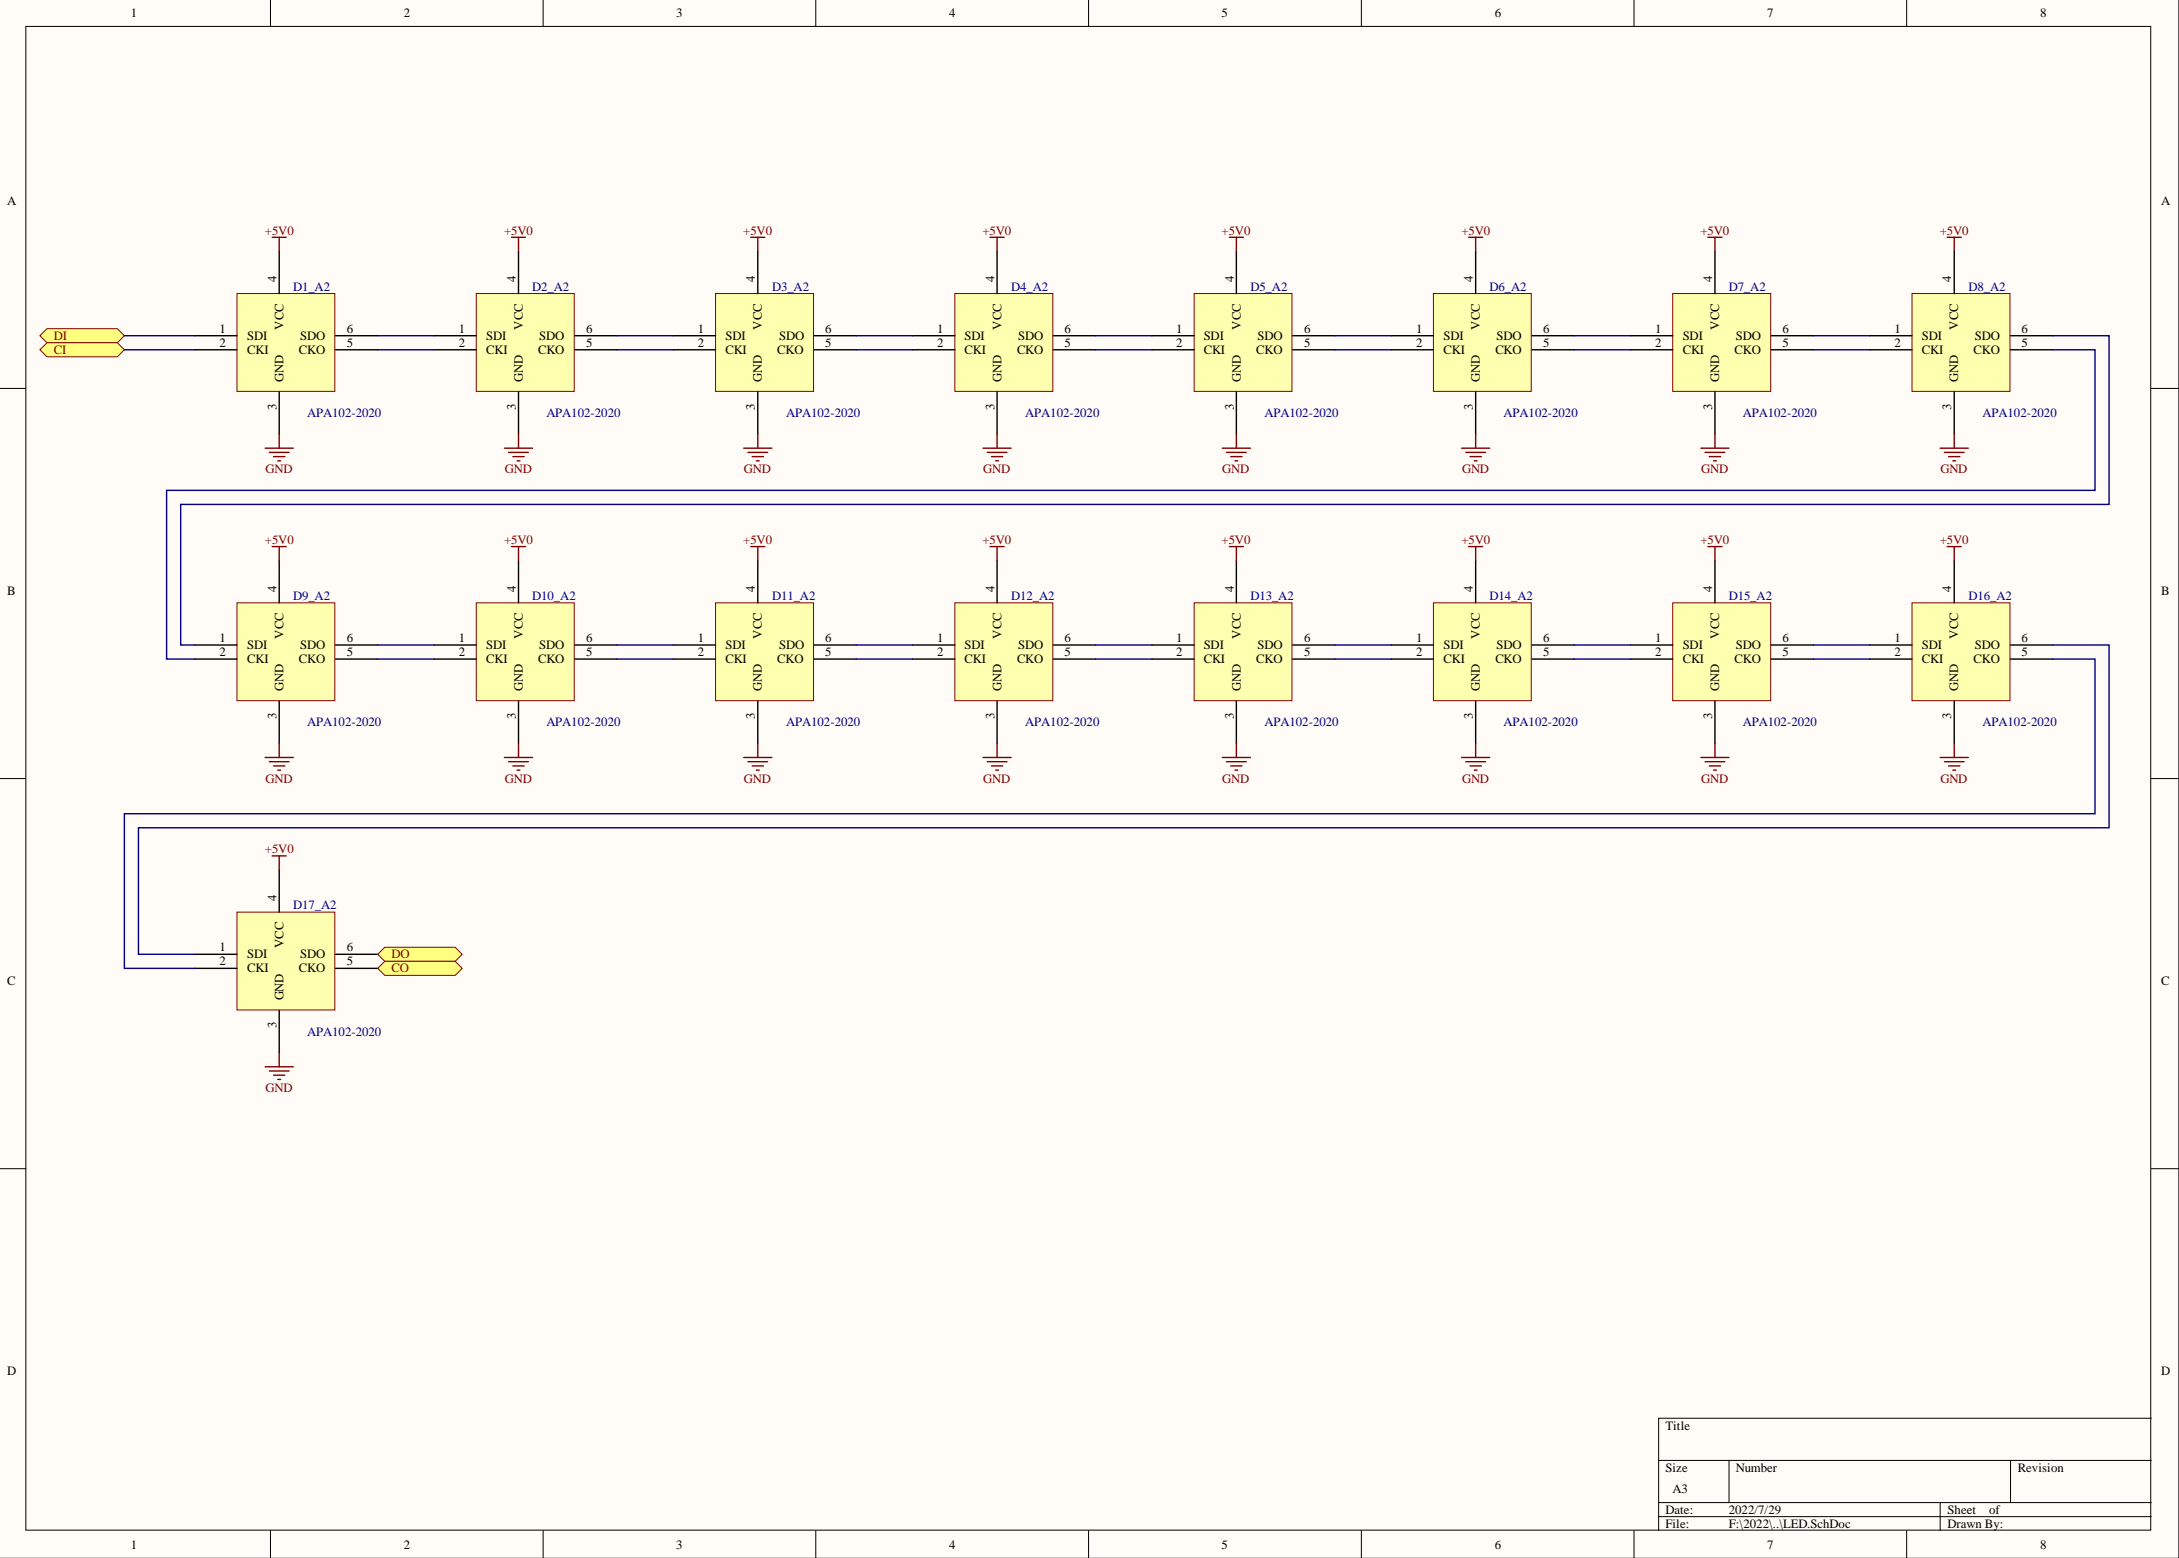

| Title          |                                     |                       |
|----------------|-------------------------------------|-----------------------|
| Size<br>A3     | Number                              | Revision              |
| Date:<br>File: | 2022/7/29<br>E:\2022\...\LED.SchDoc | Sheet of<br>Drawn By: |

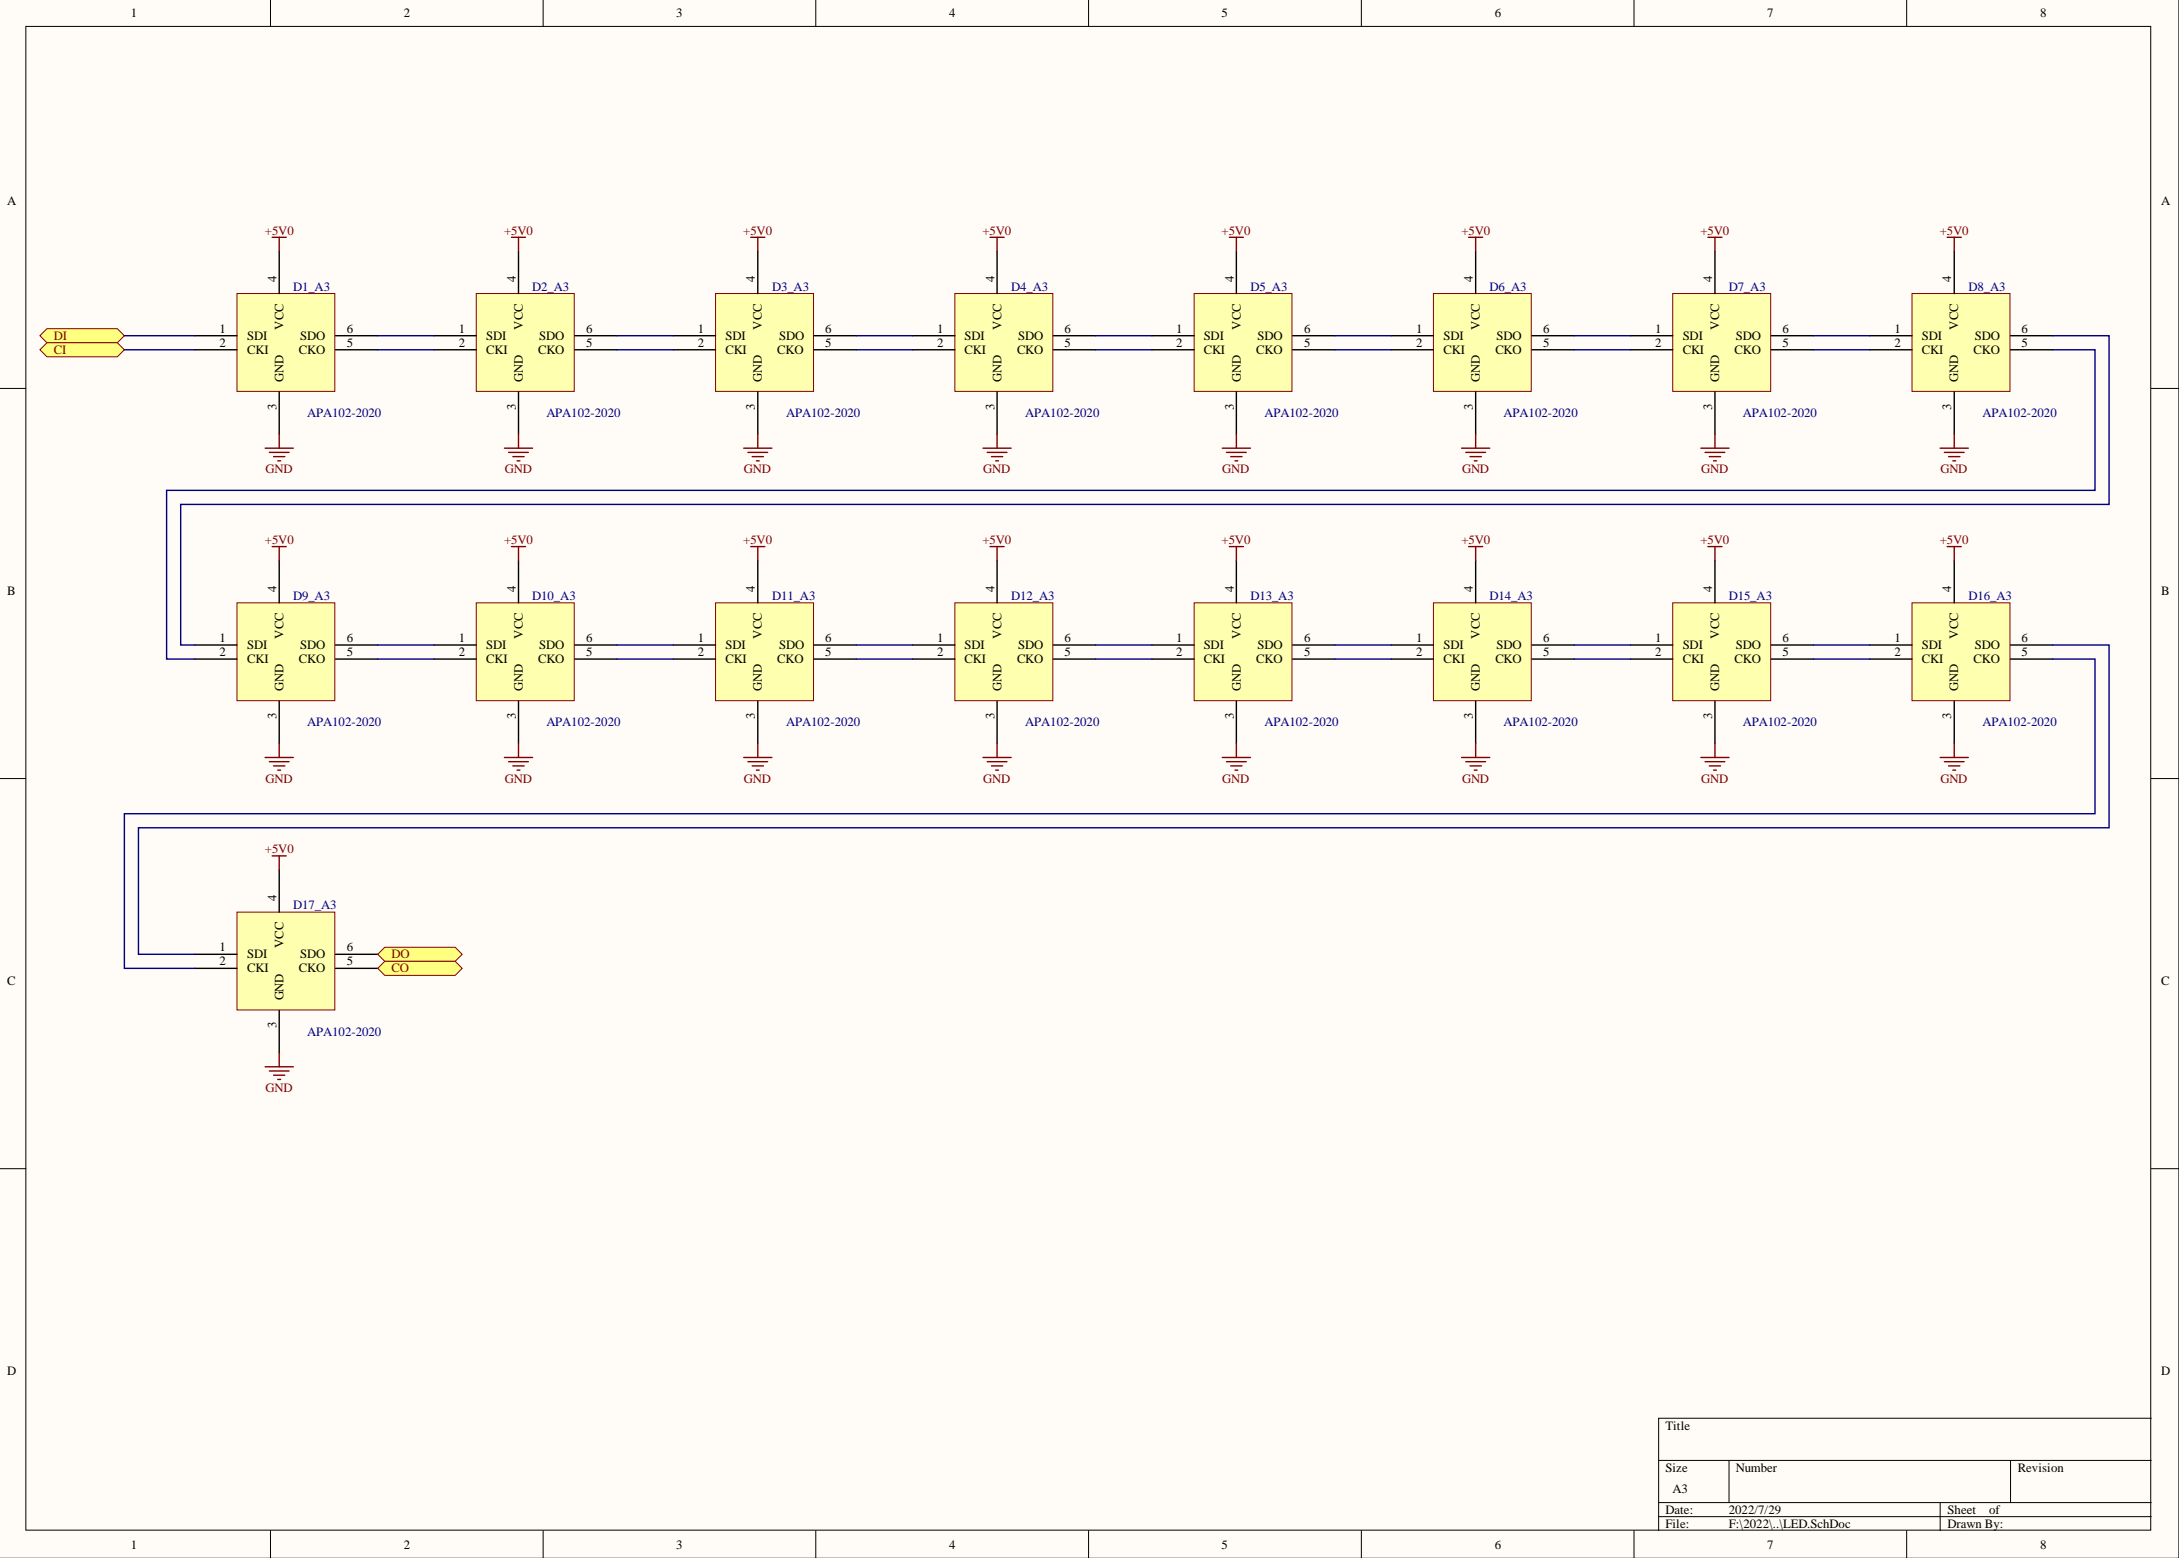

| Title      |                        |           |
|------------|------------------------|-----------|
| Size<br>A3 | Number                 | Revision  |
| Date:      | 2022/7/29              | Sheet of  |
| File:      | F:\2022\...\LED.SchDoc | Drawn By: |

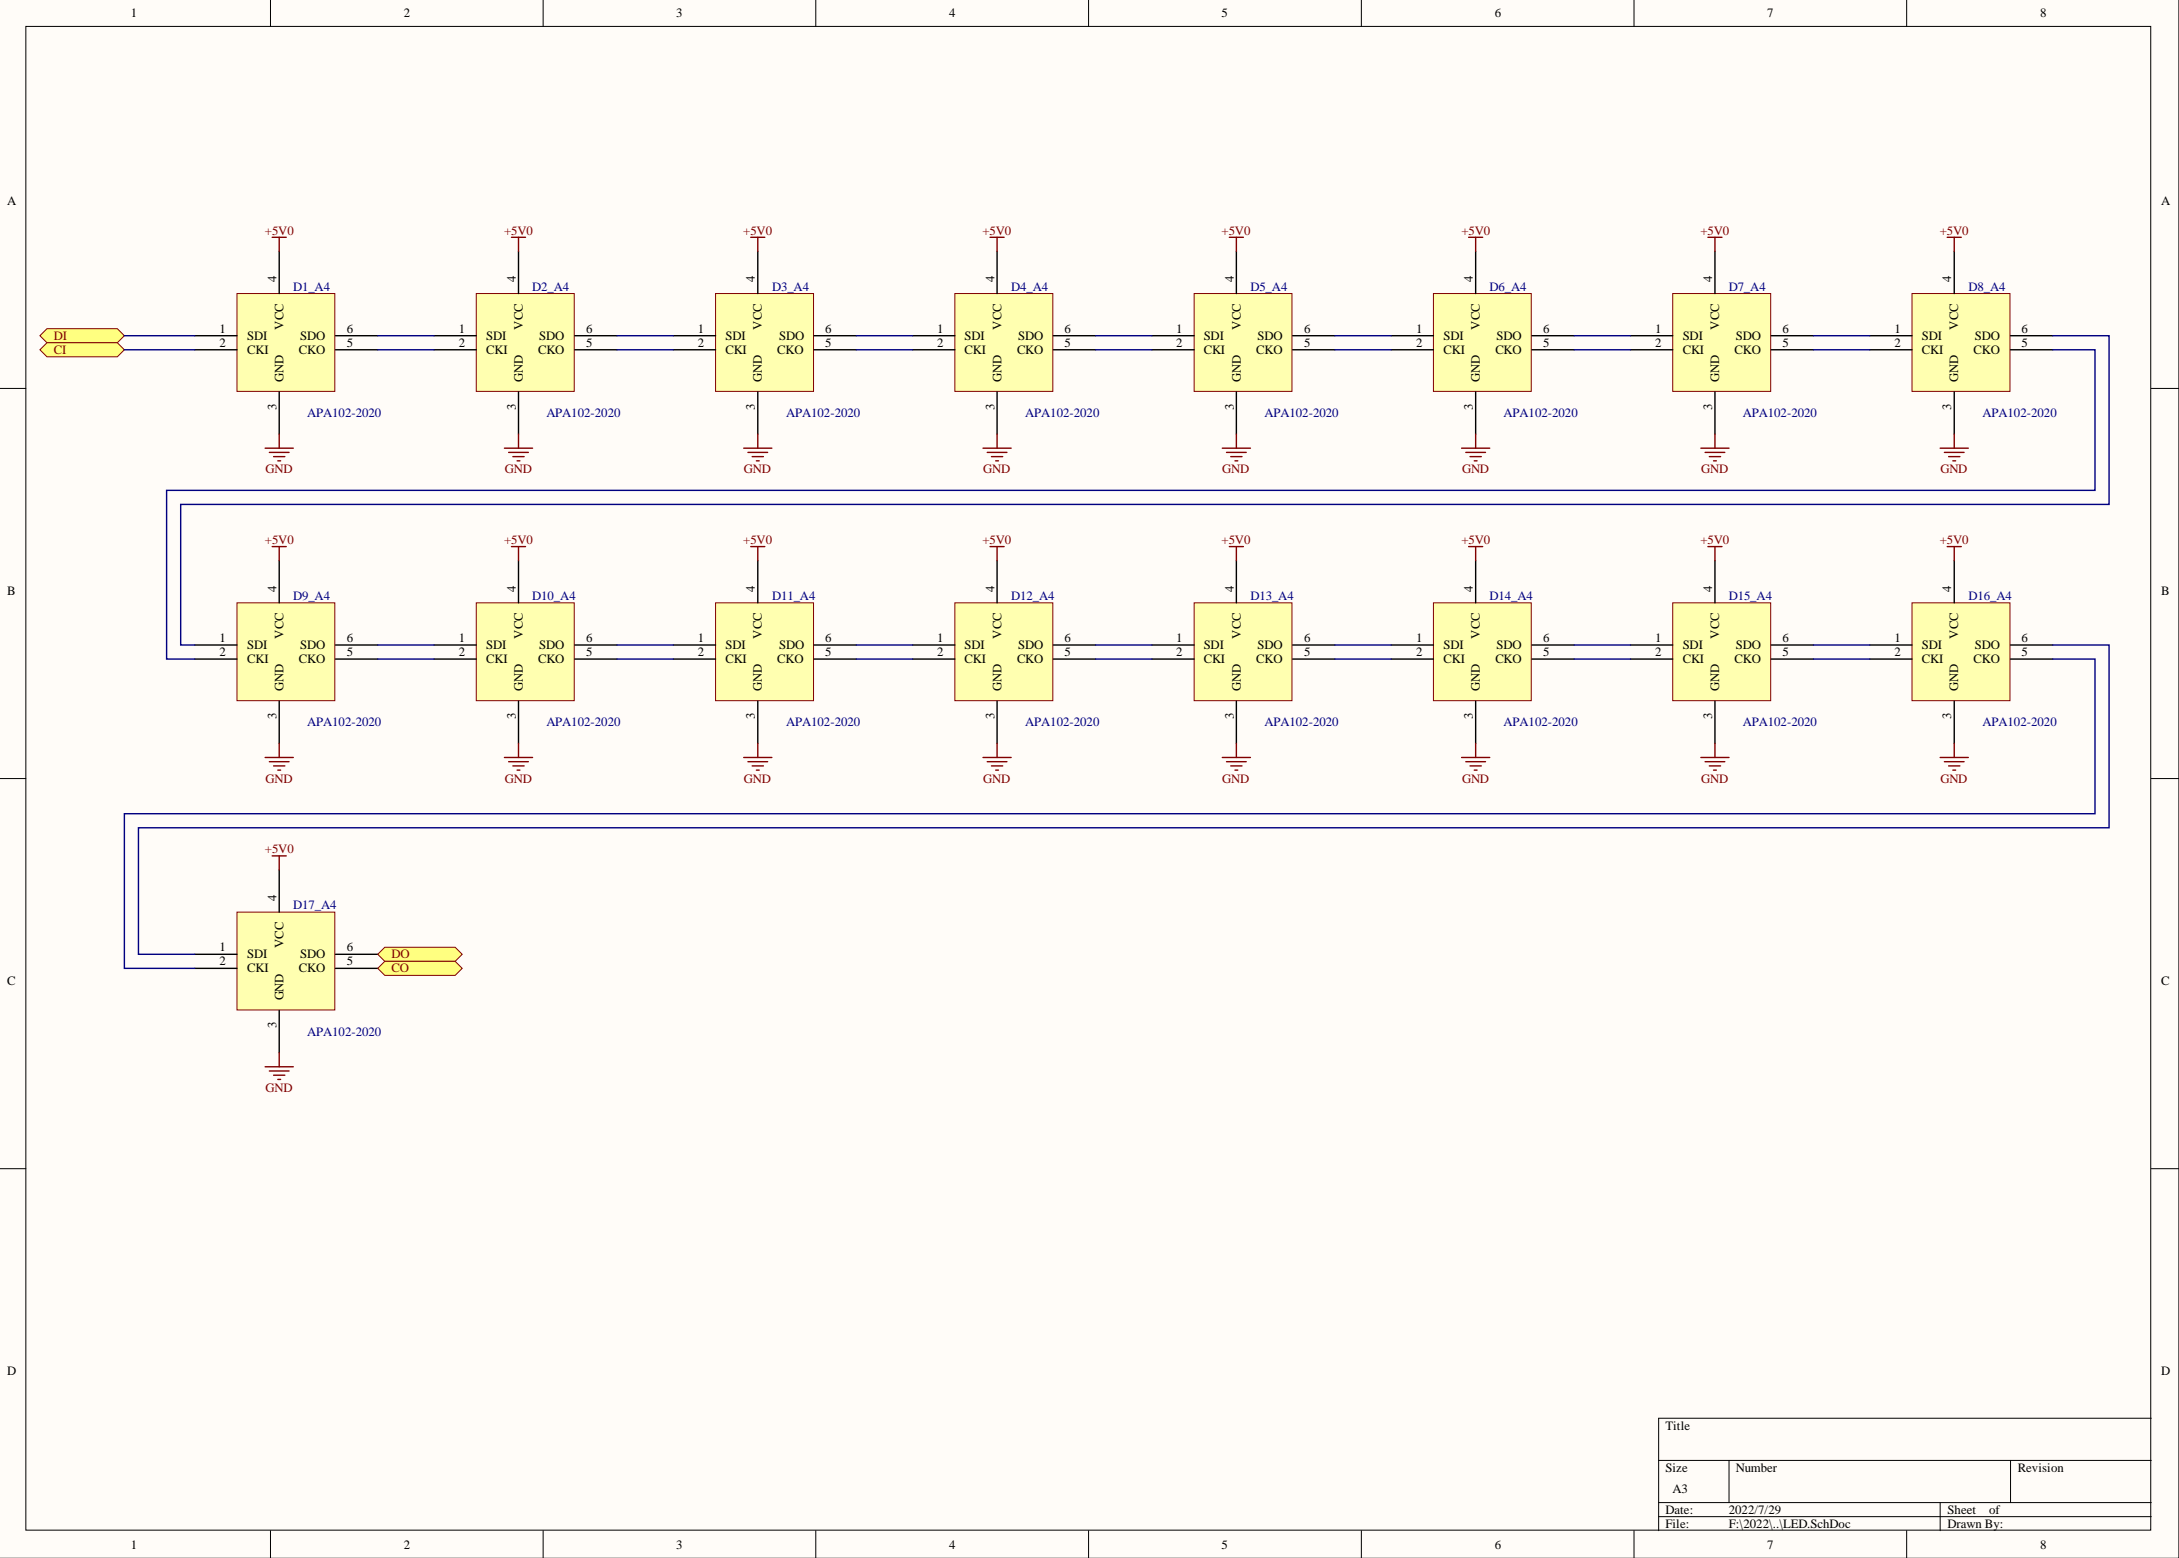

| Title          |                                     |                       |
|----------------|-------------------------------------|-----------------------|
| Size<br>A3     | Number                              | Revision              |
| Date:<br>File: | 2022/7/29<br>F:\2022\...\LED.SchDoc | Sheet of<br>Drawn By: |

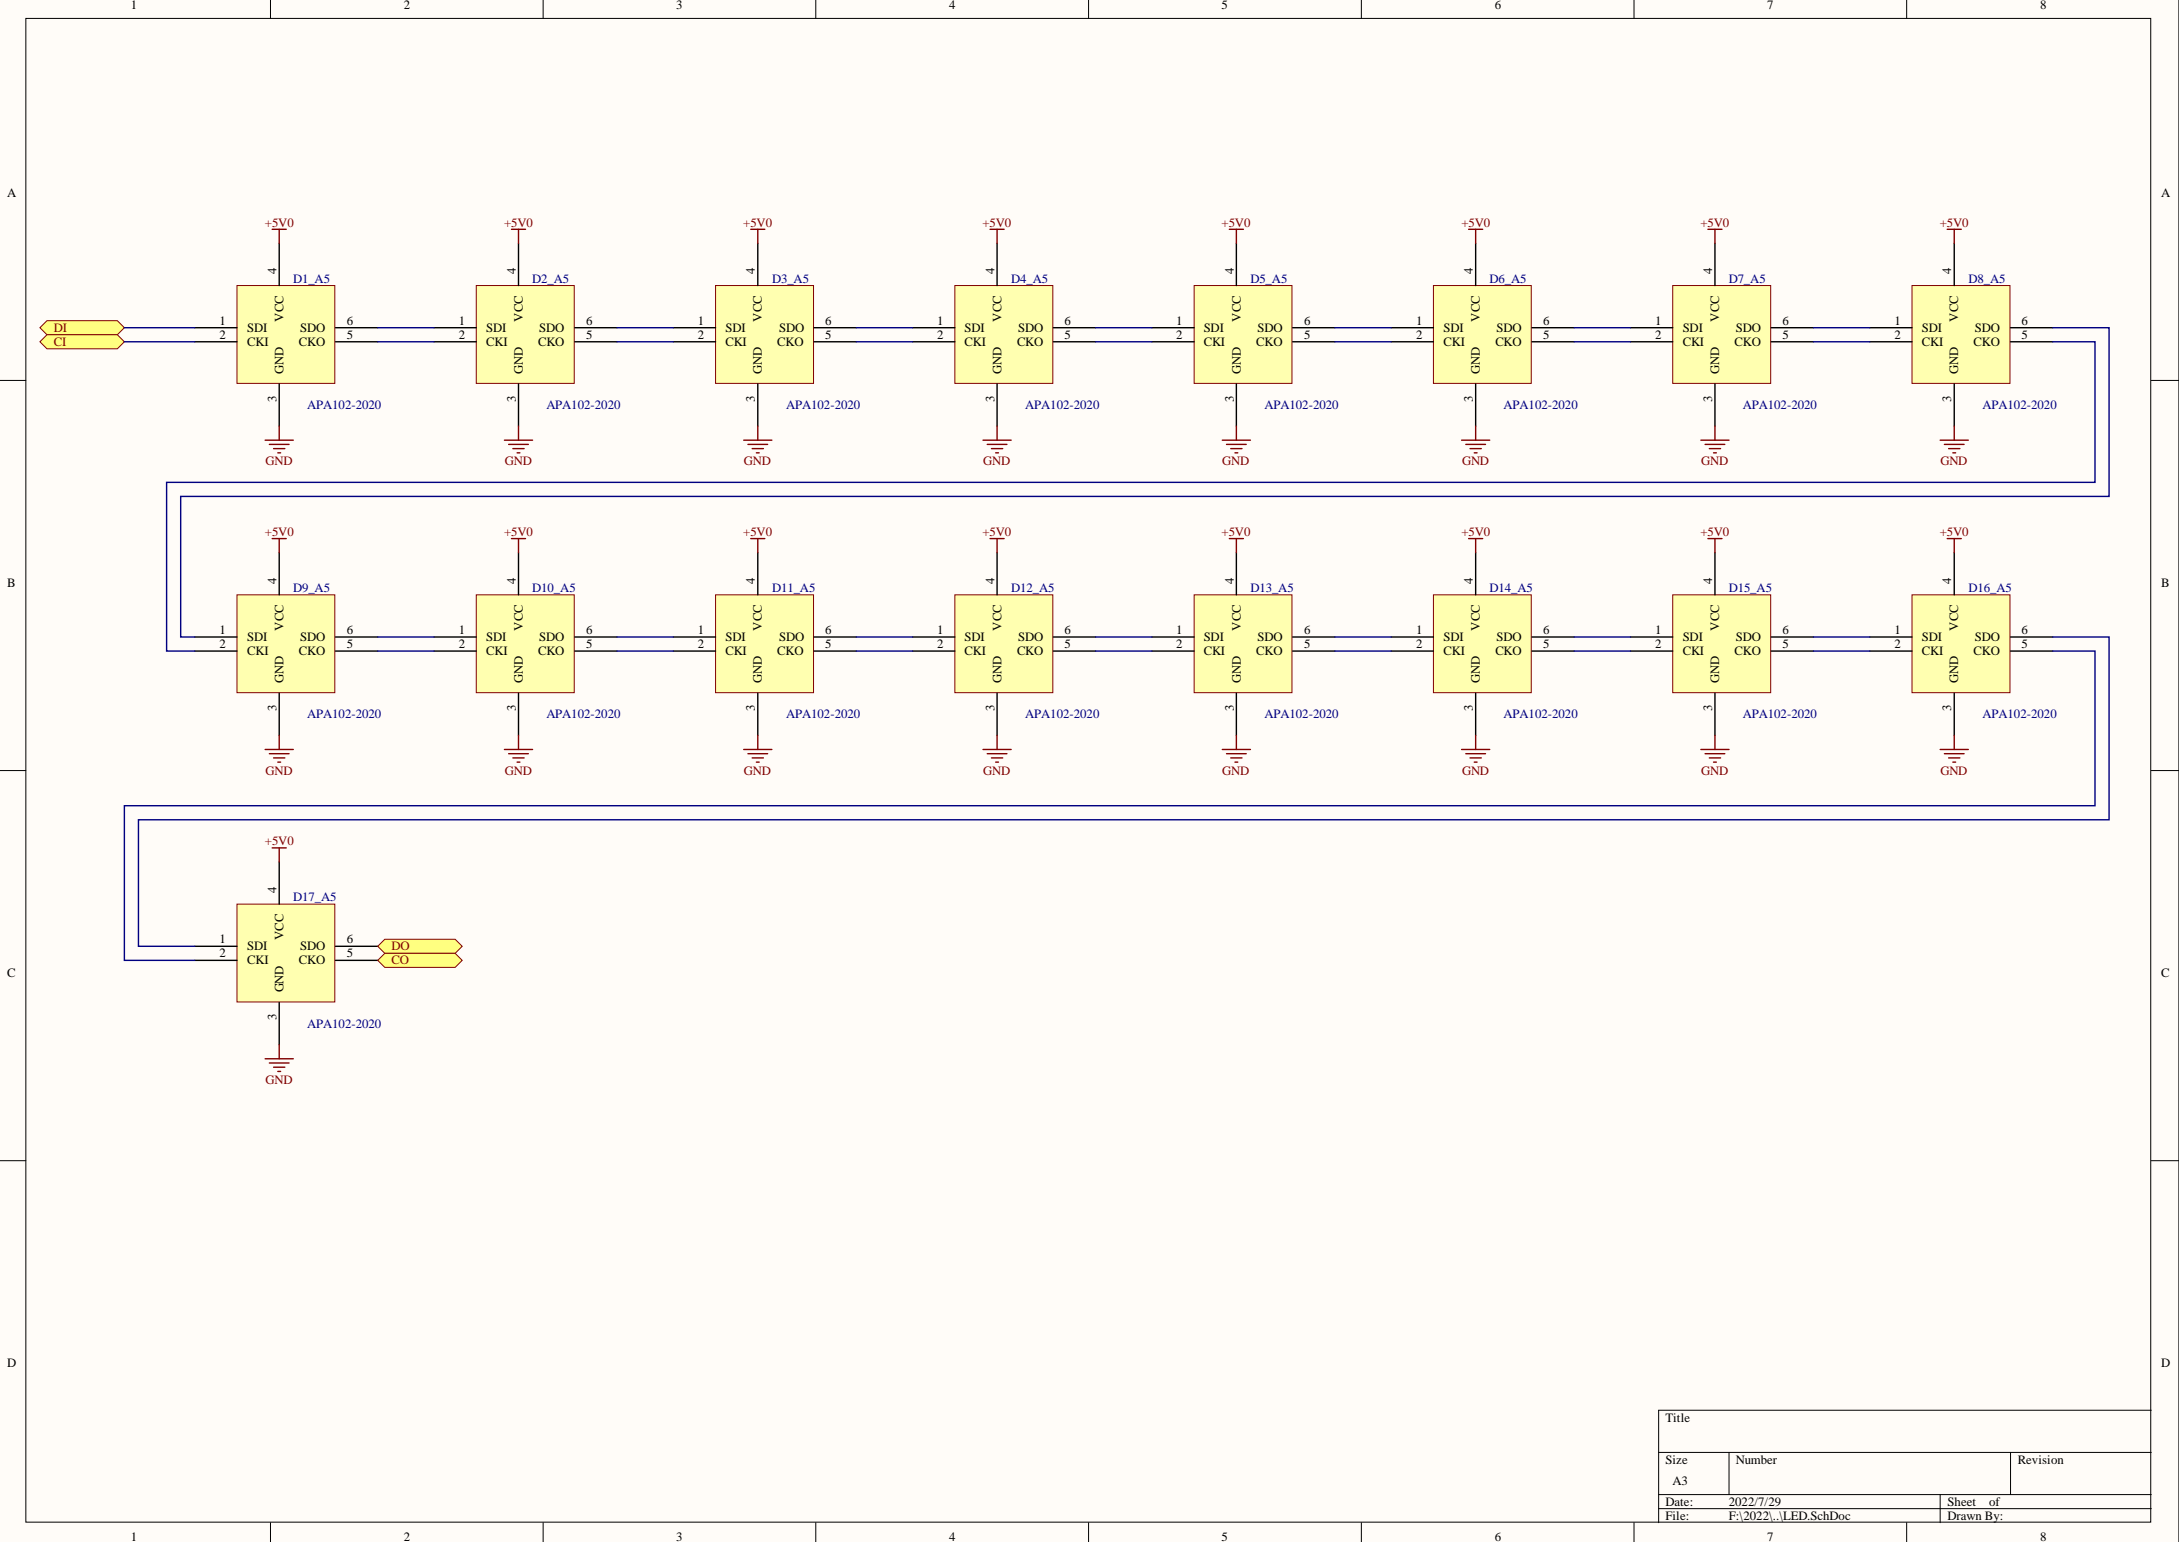

| Title          |                                     |                       |
|----------------|-------------------------------------|-----------------------|
| Size<br>A3     | Number                              | Revision              |
| Date:<br>File: | 2022/7/29<br>E:\2022\...\LED.SchDoc | Sheet of<br>Drawn By: |

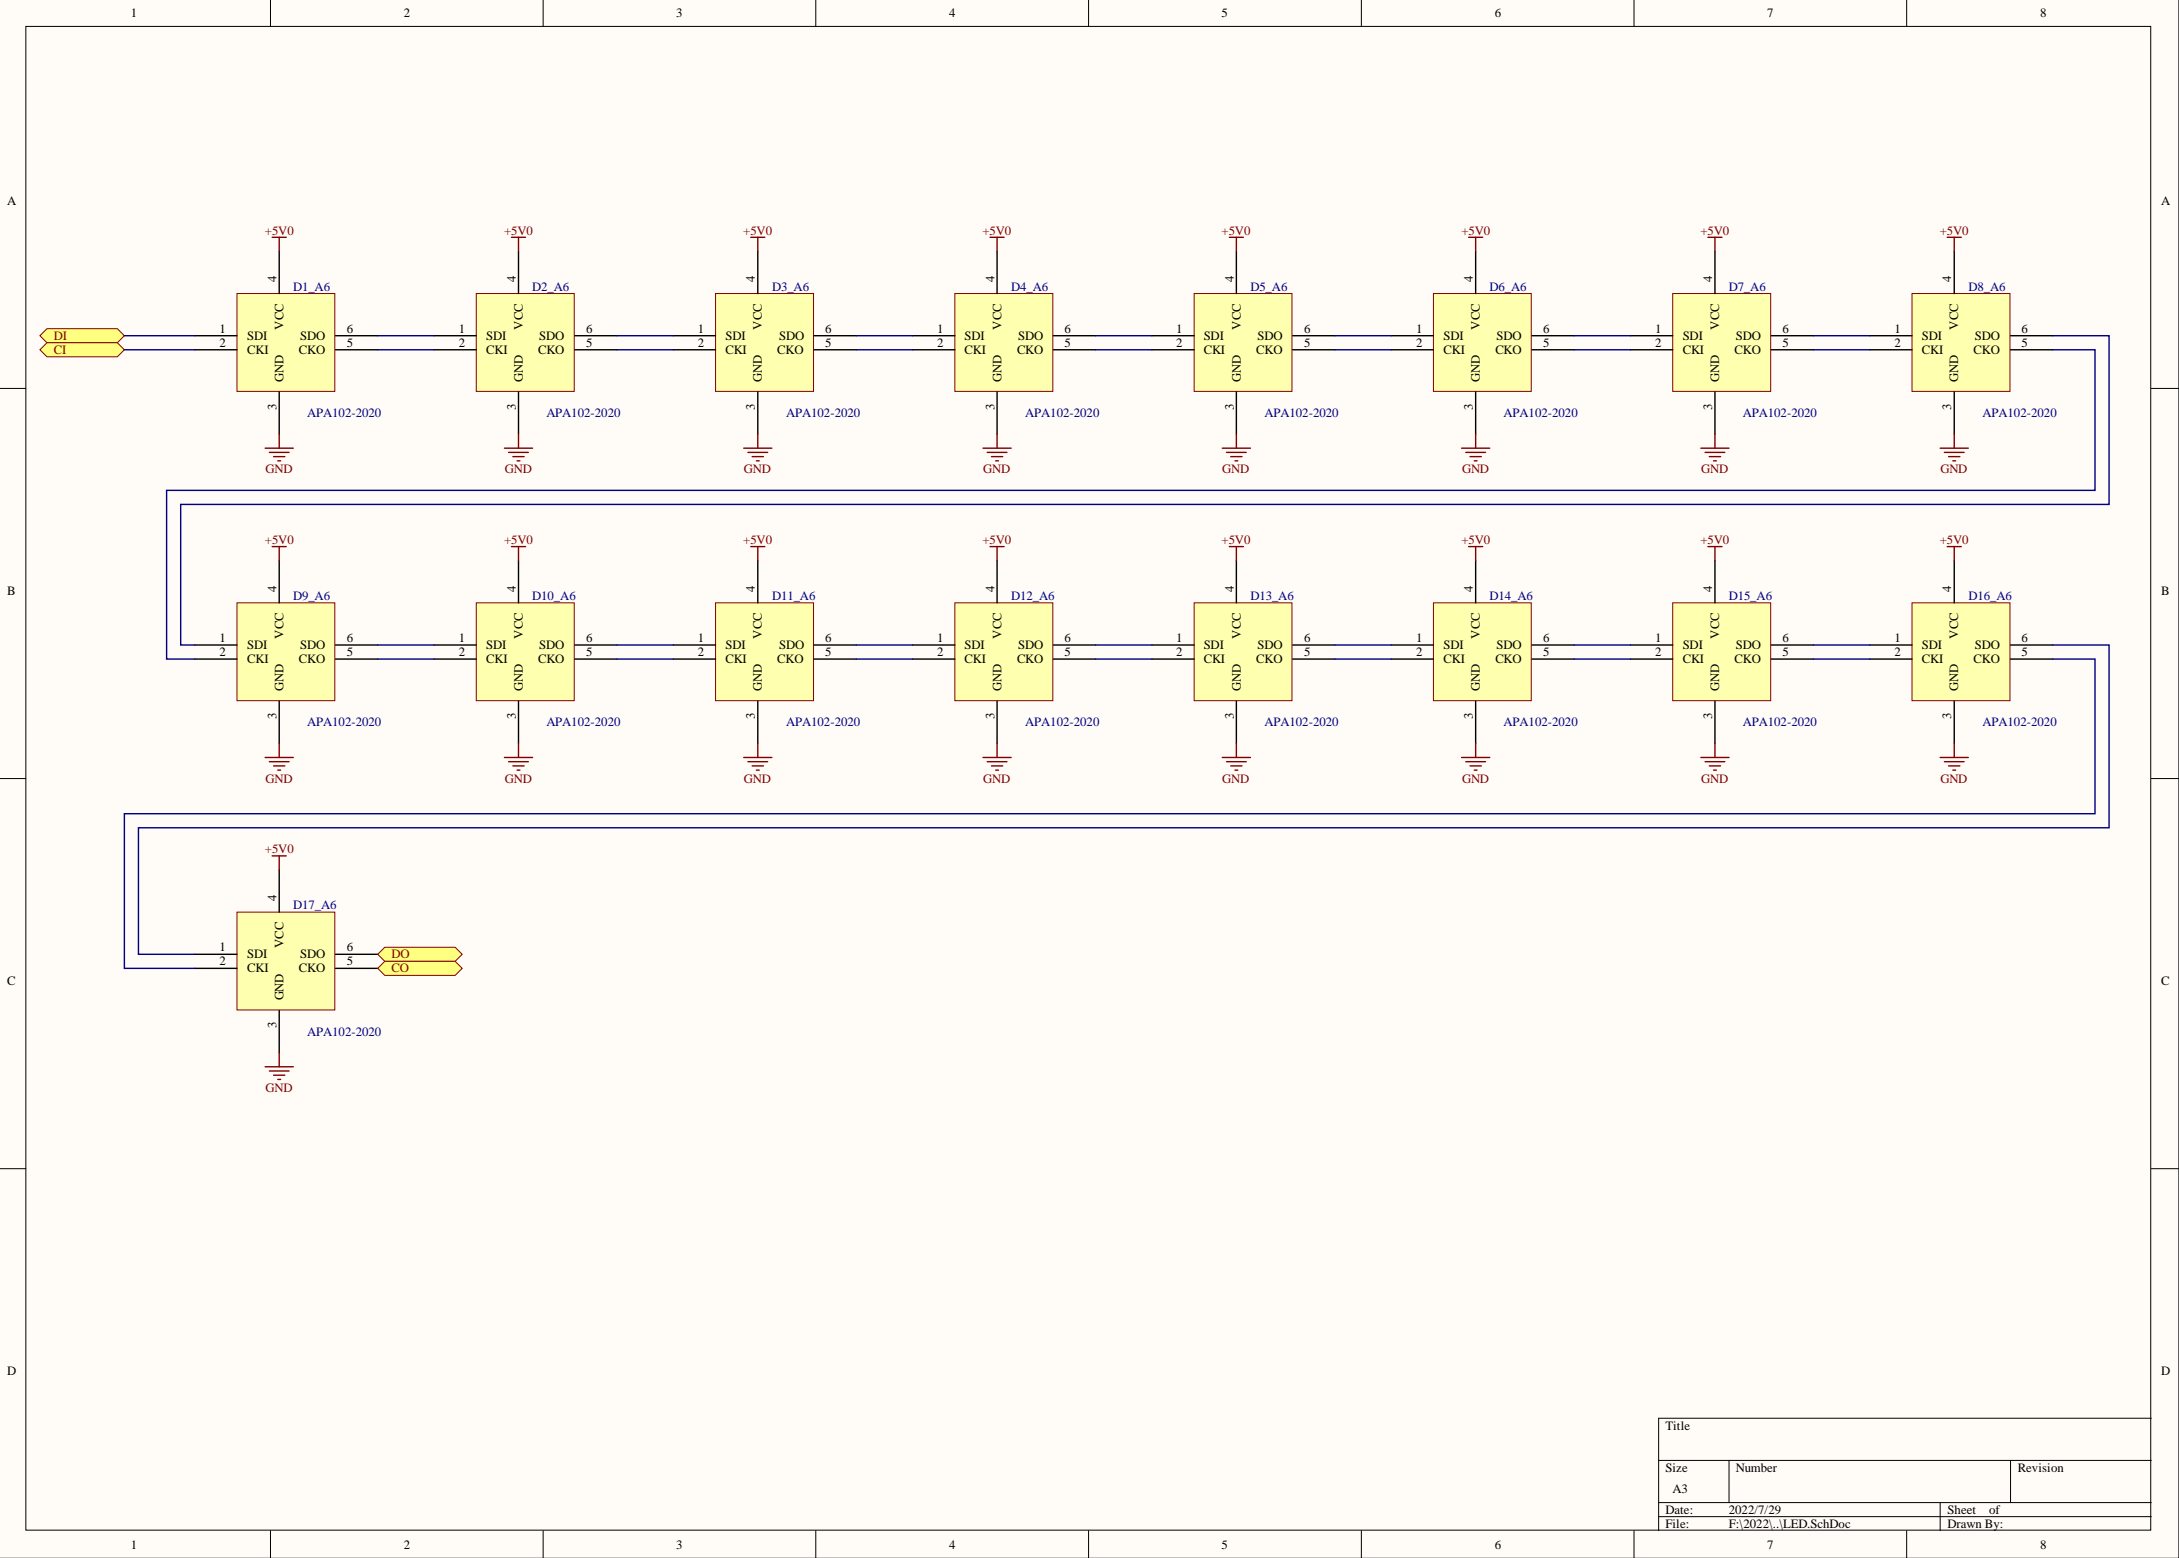

| Title          |                                     |                       |
|----------------|-------------------------------------|-----------------------|
| Size<br>A3     | Number                              | Revision              |
| Date:<br>File: | 2022/7/29<br>F:\2022\...\LED.SchDoc | Sheet of<br>Drawn By: |

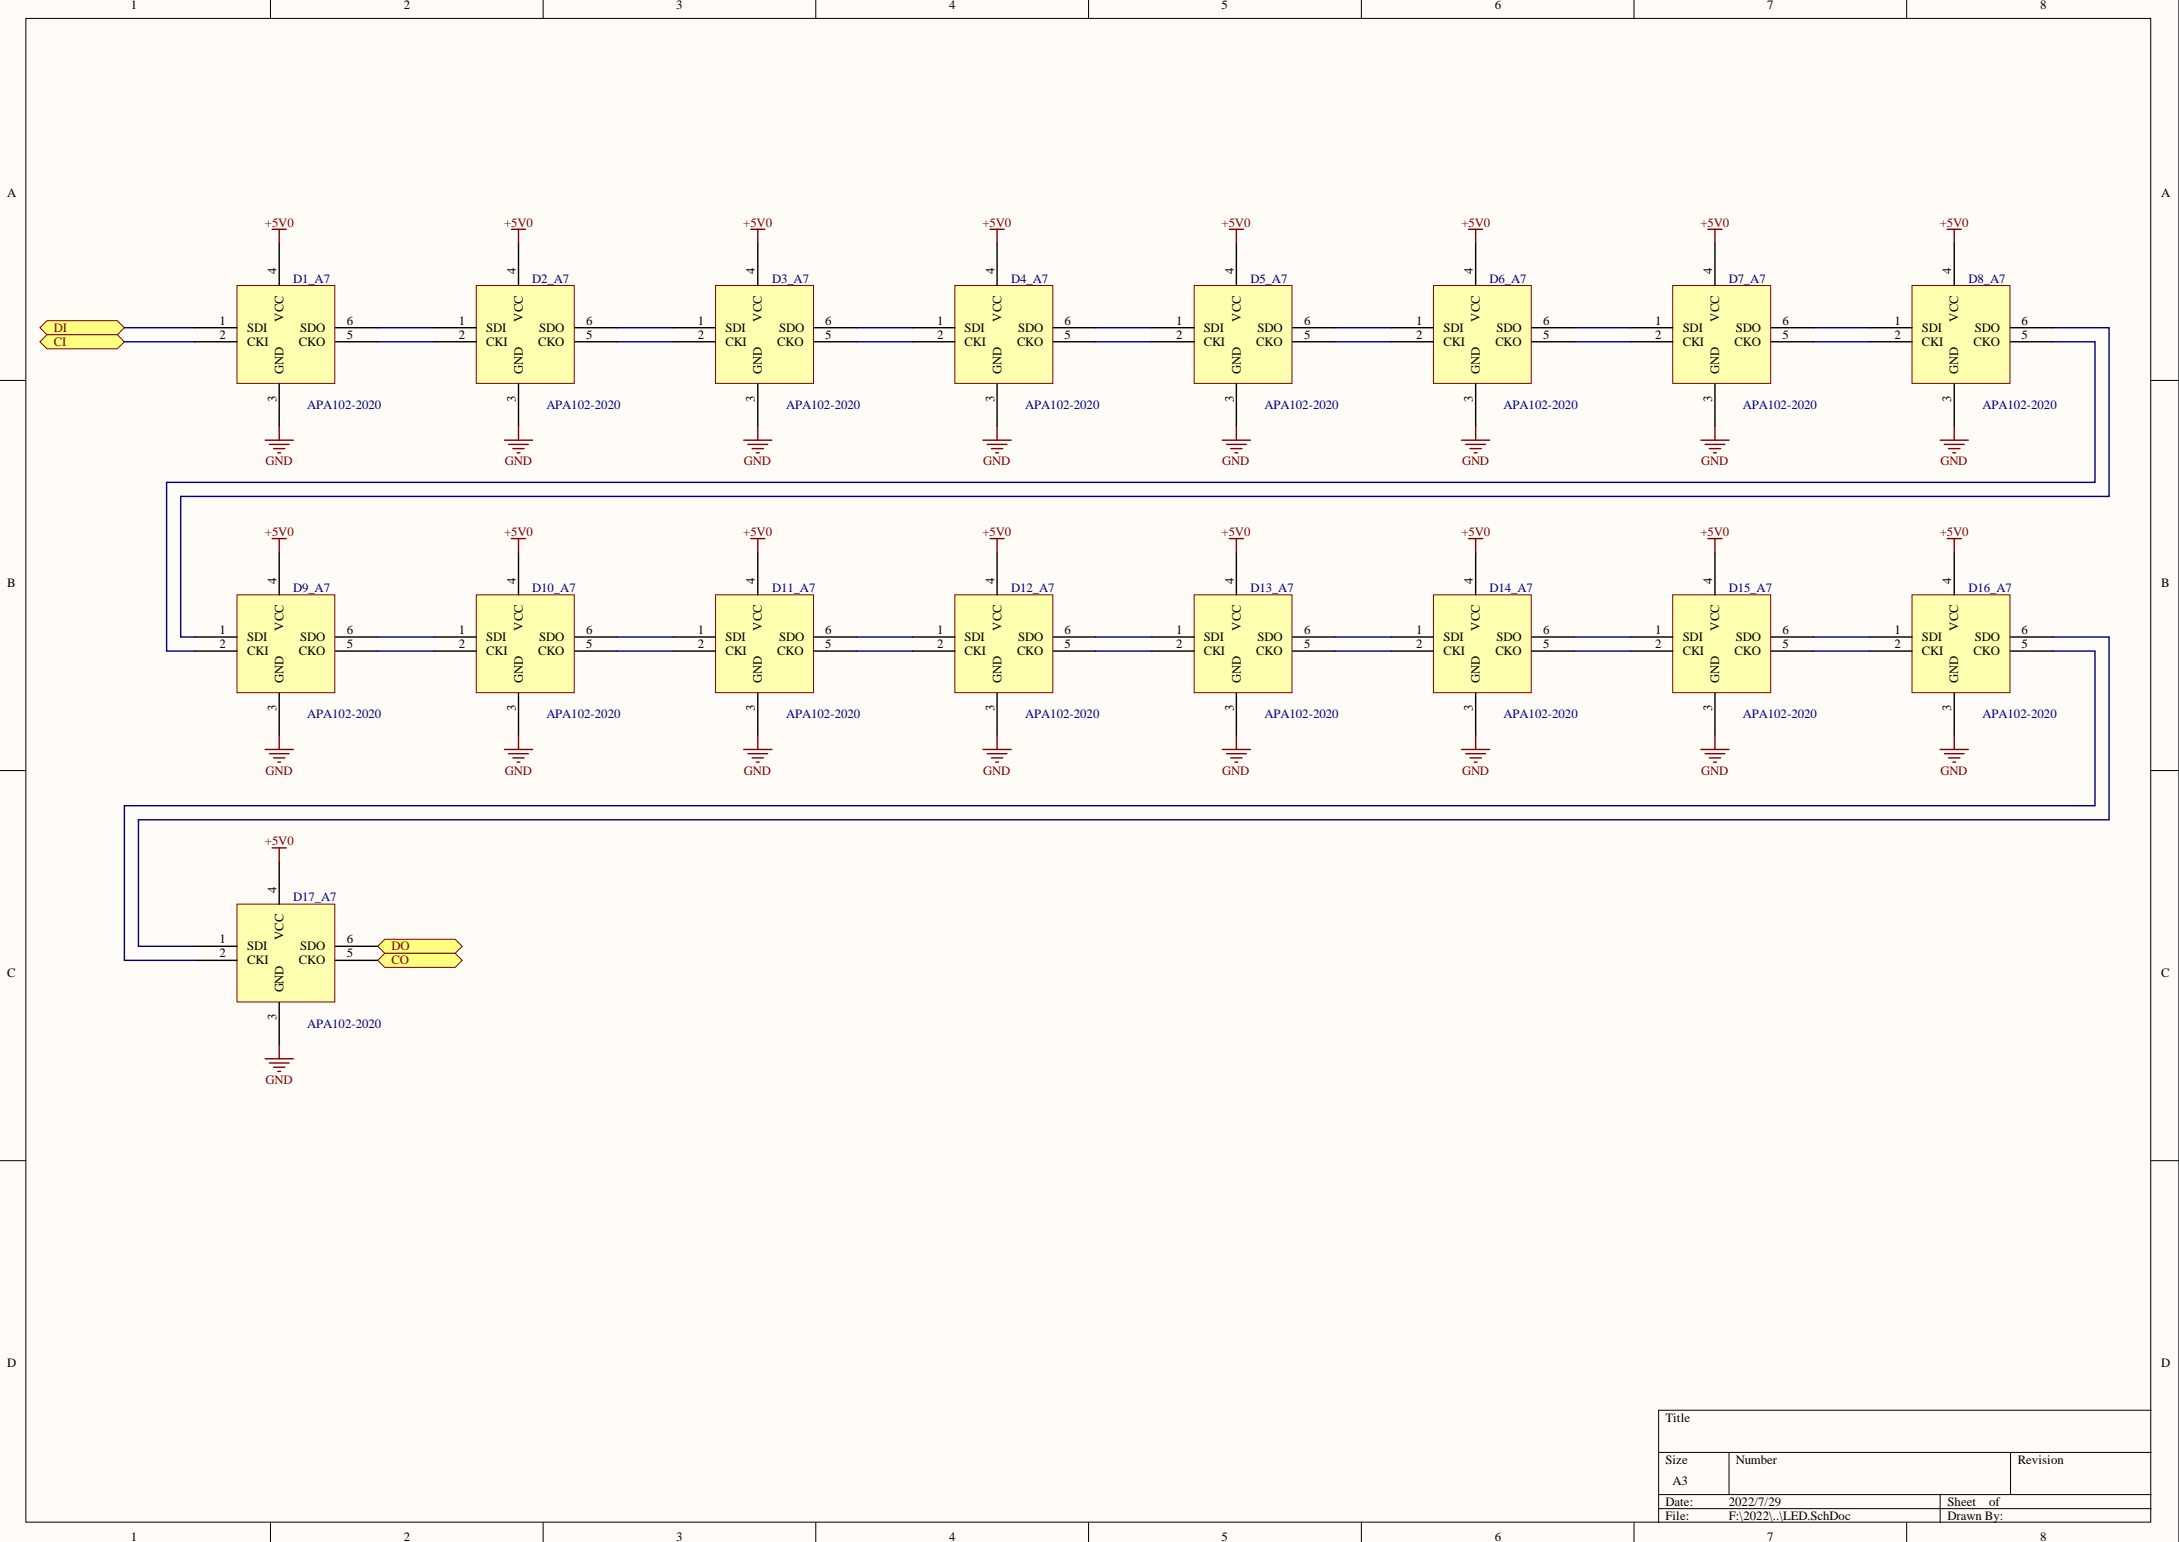

| Title |                        |           |
|-------|------------------------|-----------|
| Size  | Number                 | Revision  |
| A3    |                        |           |
| Date: | 2022/7/29              | Sheet of  |
| File: | F:\2022\...\LED.SchDoc | Drawn By: |

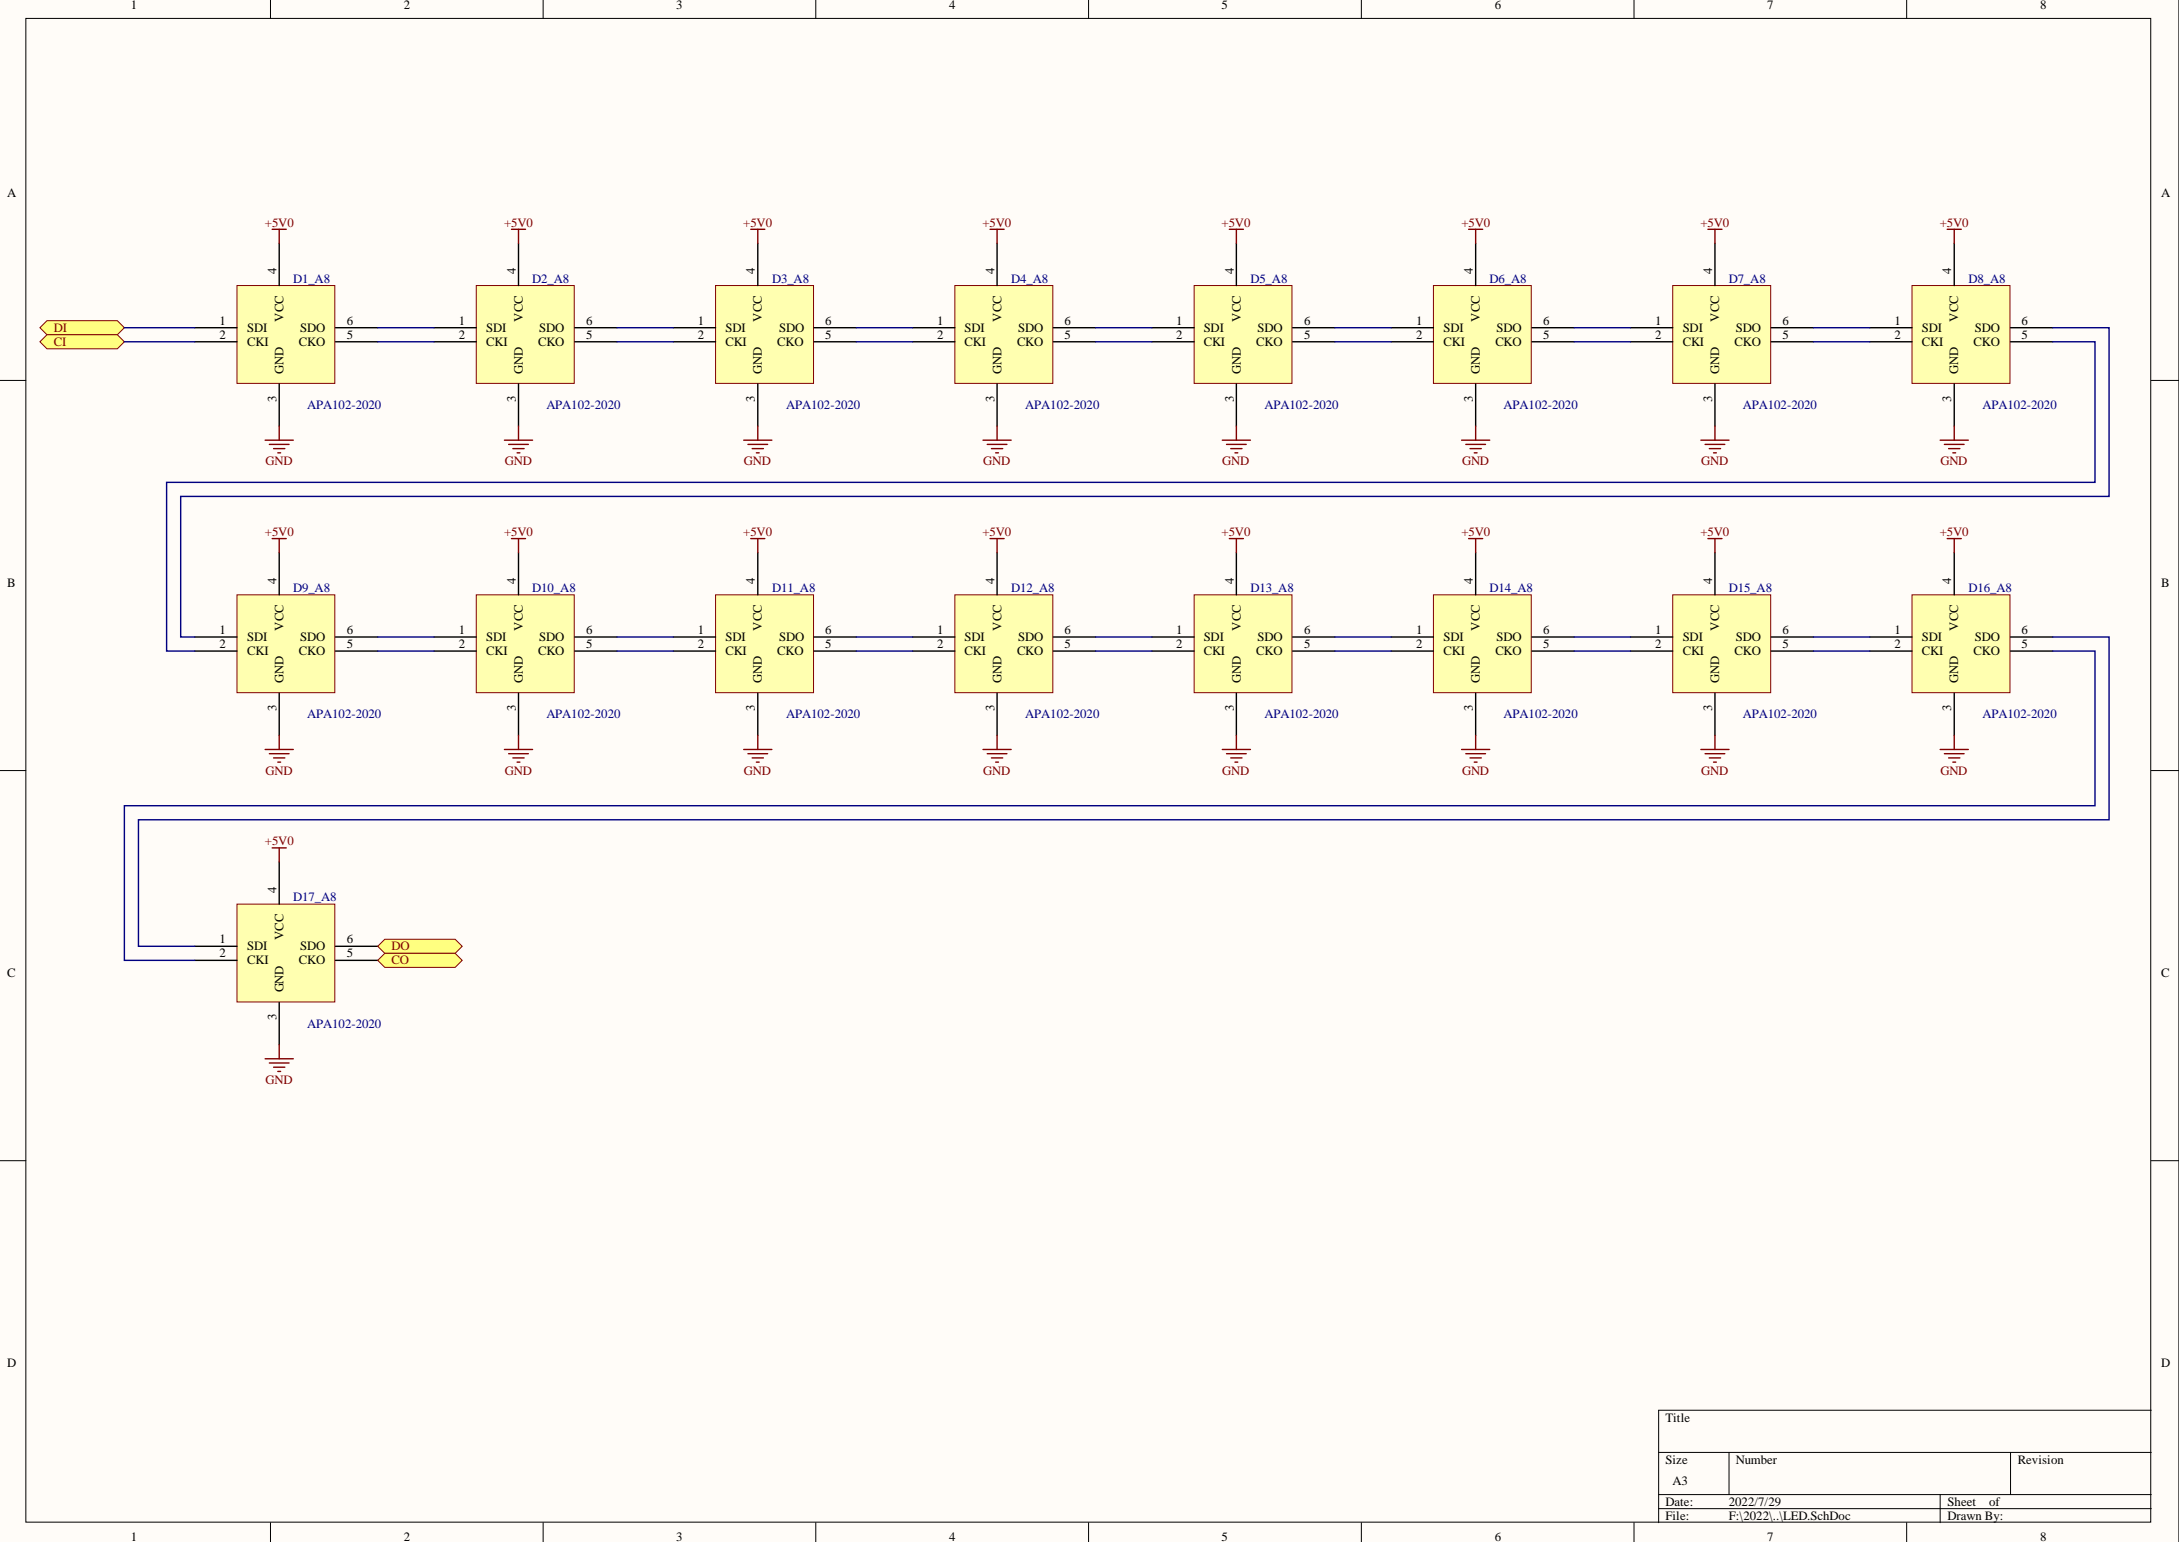

| Title          |                                     |                       |
|----------------|-------------------------------------|-----------------------|
| Size<br>A3     | Number                              | Revision              |
| Date:<br>File: | 2022/7/29<br>F:\2022\...\LED.SchDoc | Sheet of<br>Drawn By: |



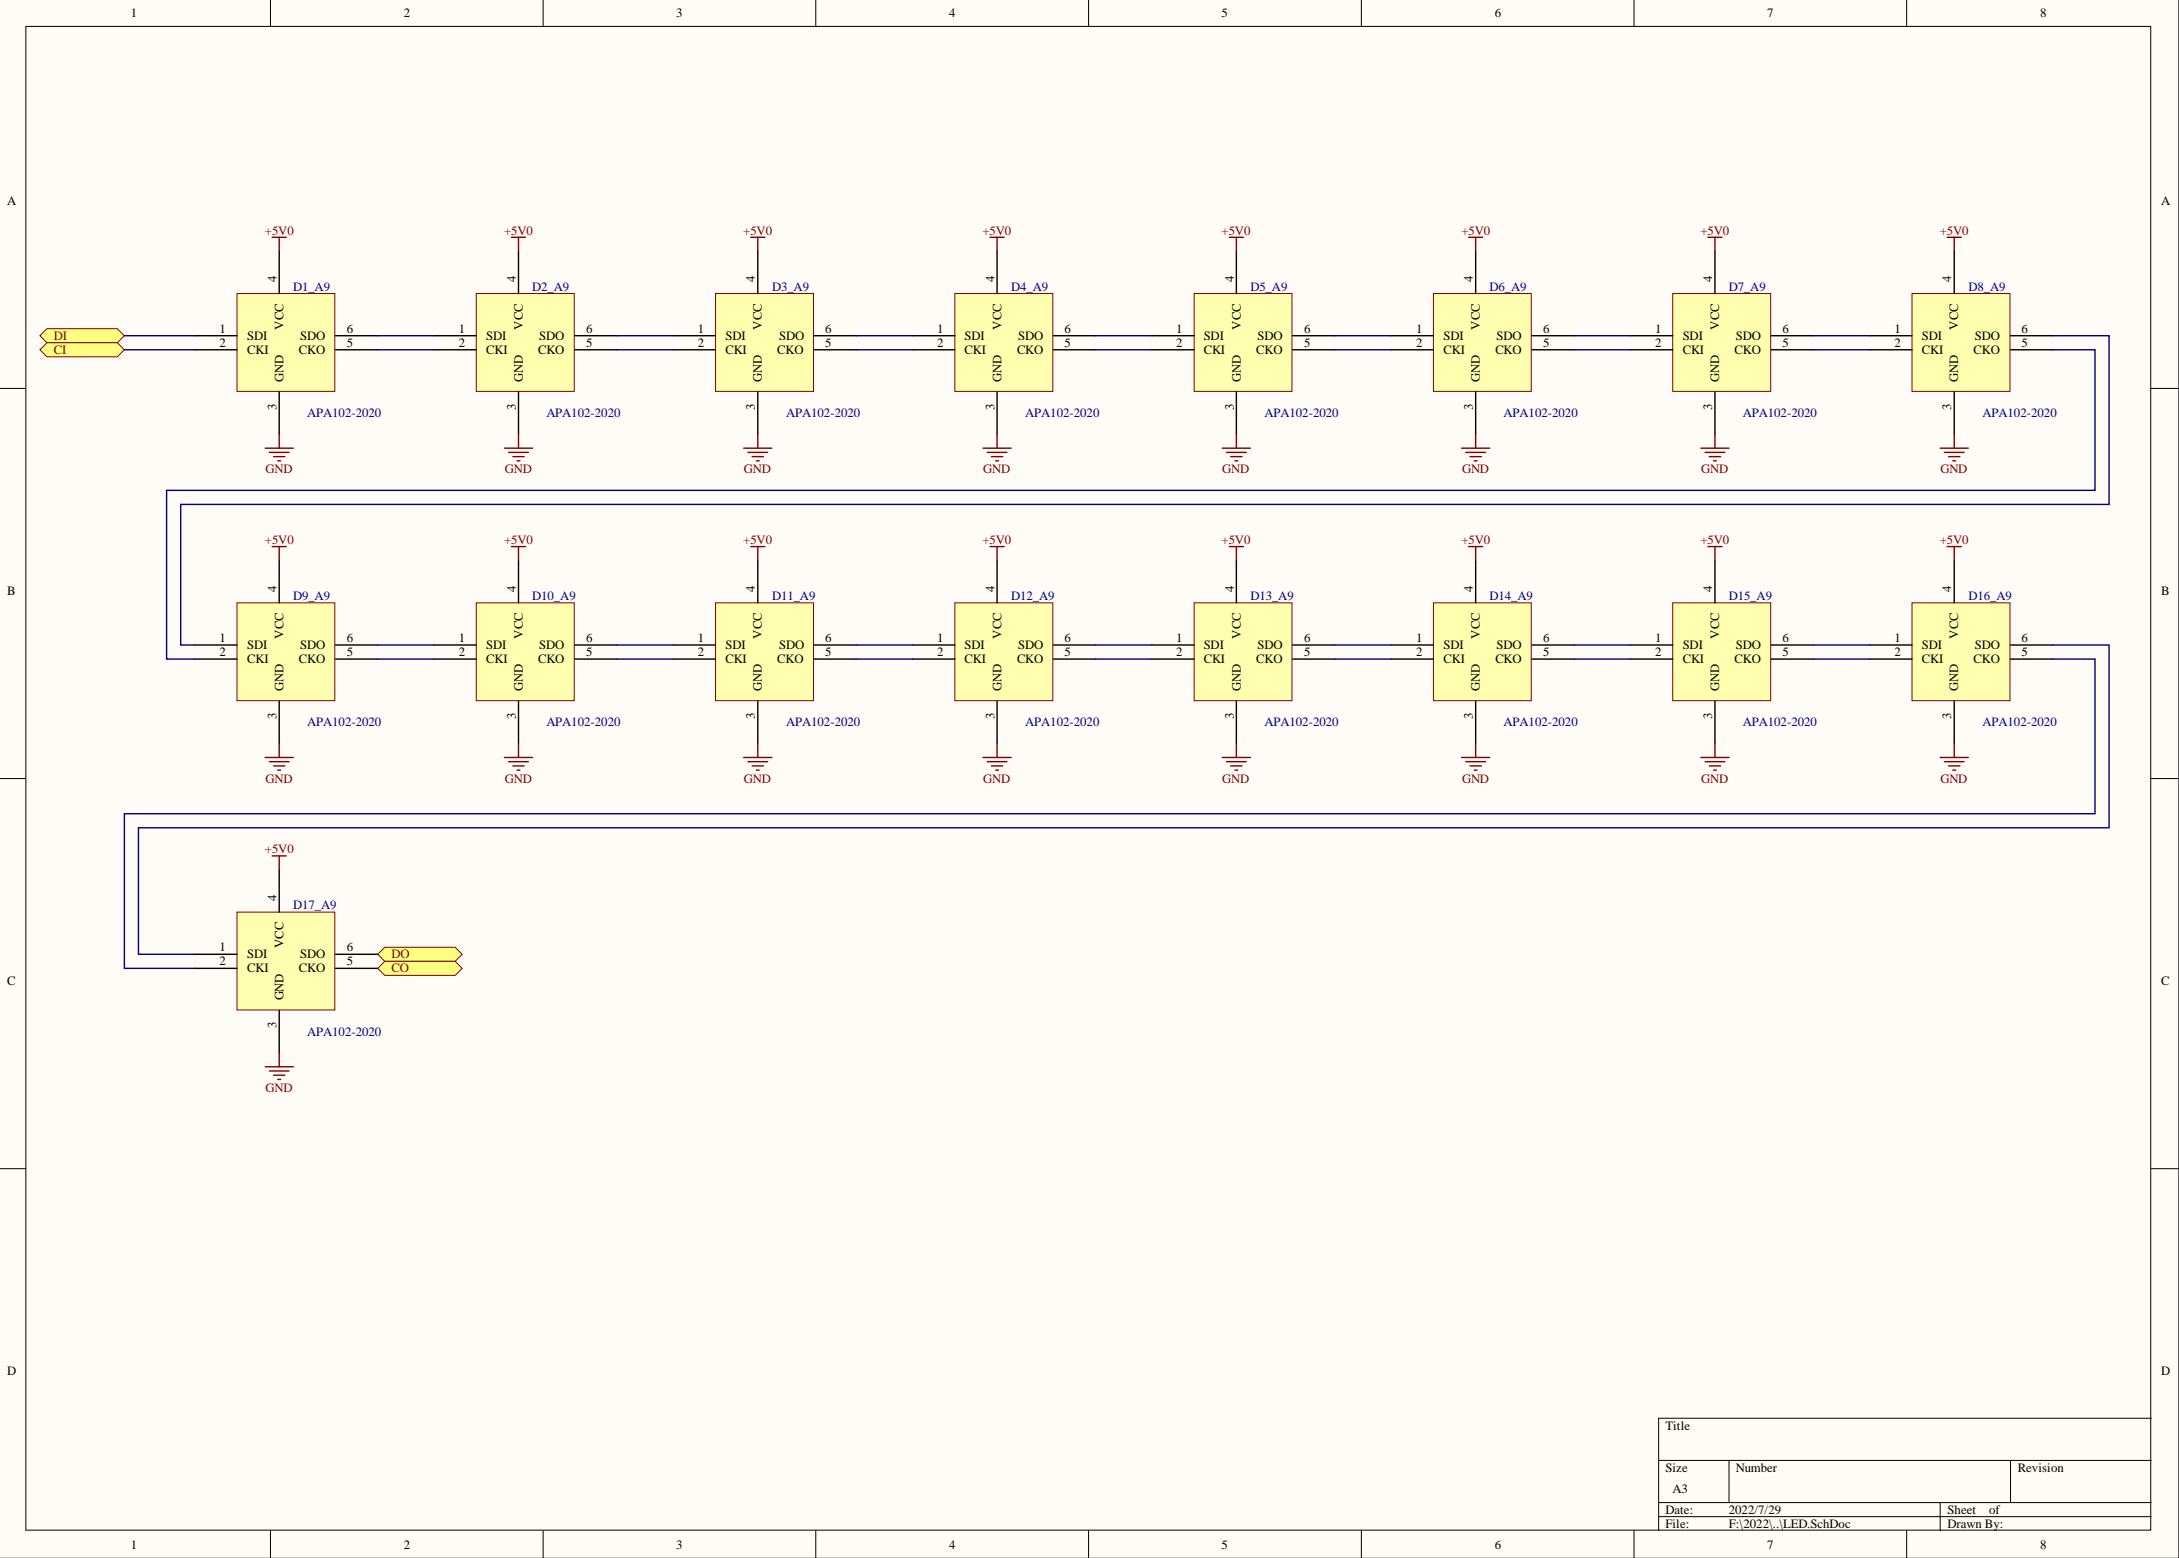

| Title      |                        |           |
|------------|------------------------|-----------|
| Size<br>A3 | Number                 | Revision  |
| Date:      | 2022/7/29              | Sheet of  |
| File:      | F:\2022\...\LED.SchDoc | Drawn By: |

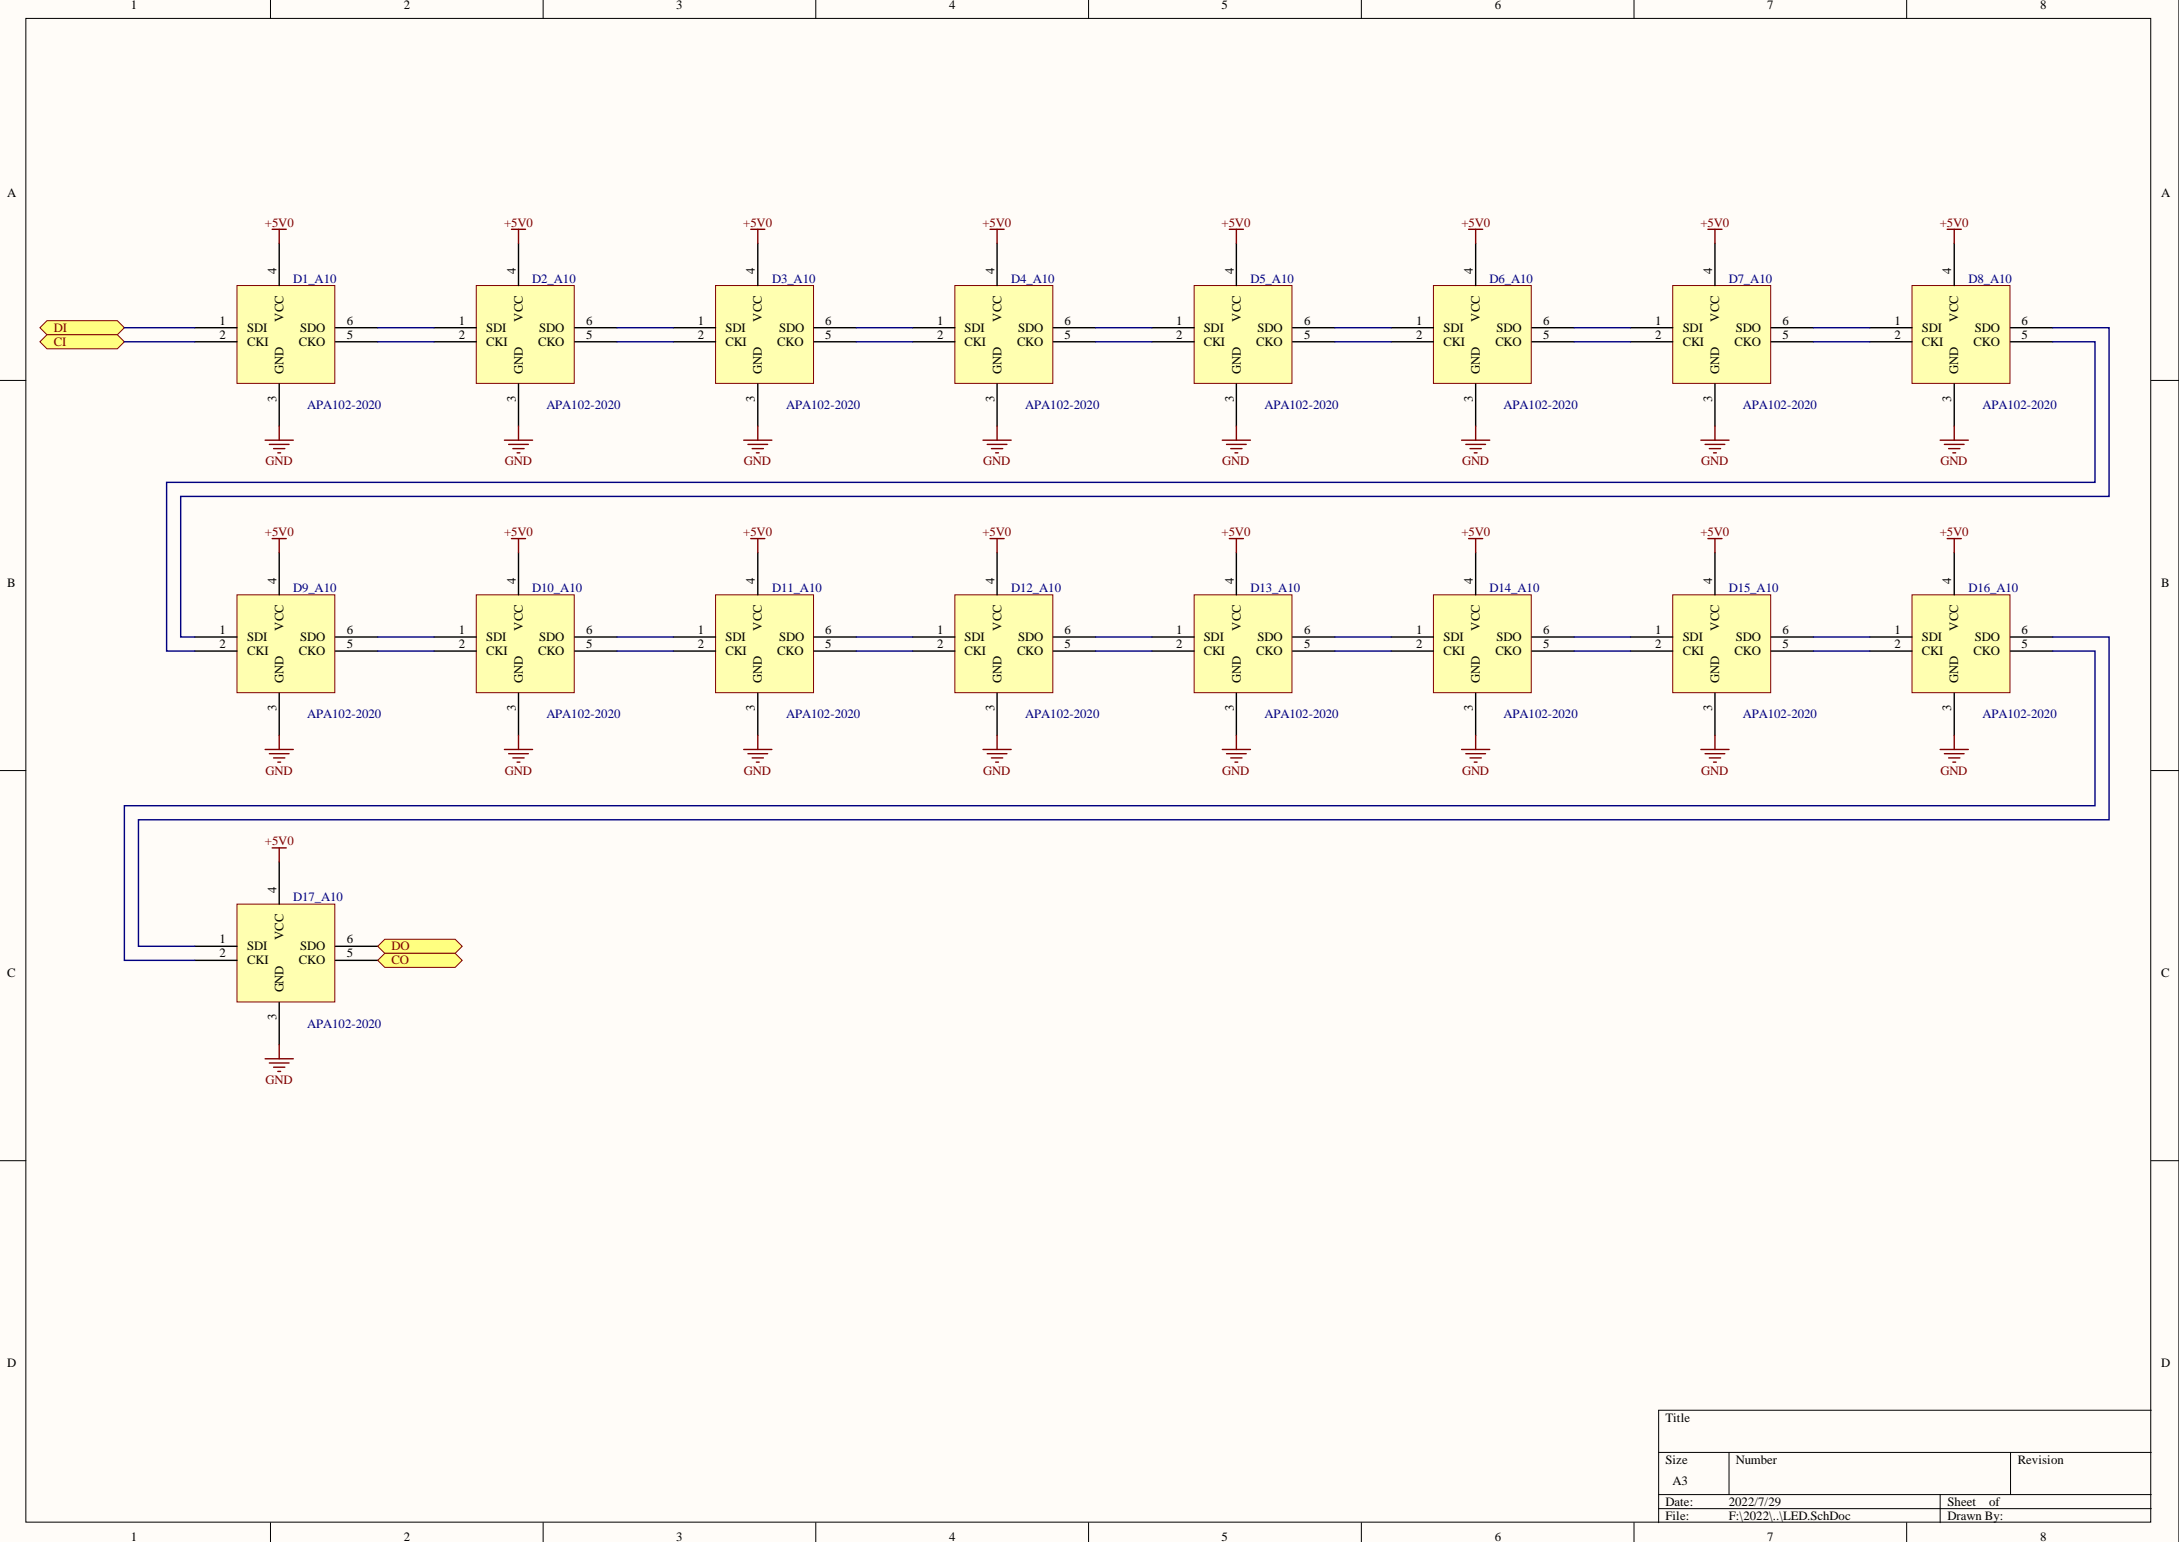

| Title          |                                     |                       |
|----------------|-------------------------------------|-----------------------|
| Size<br>A3     | Number                              | Revision              |
| Date:<br>File: | 2022/7/29<br>E:\2022\...\LED.SchDoc | Sheet of<br>Drawn By: |

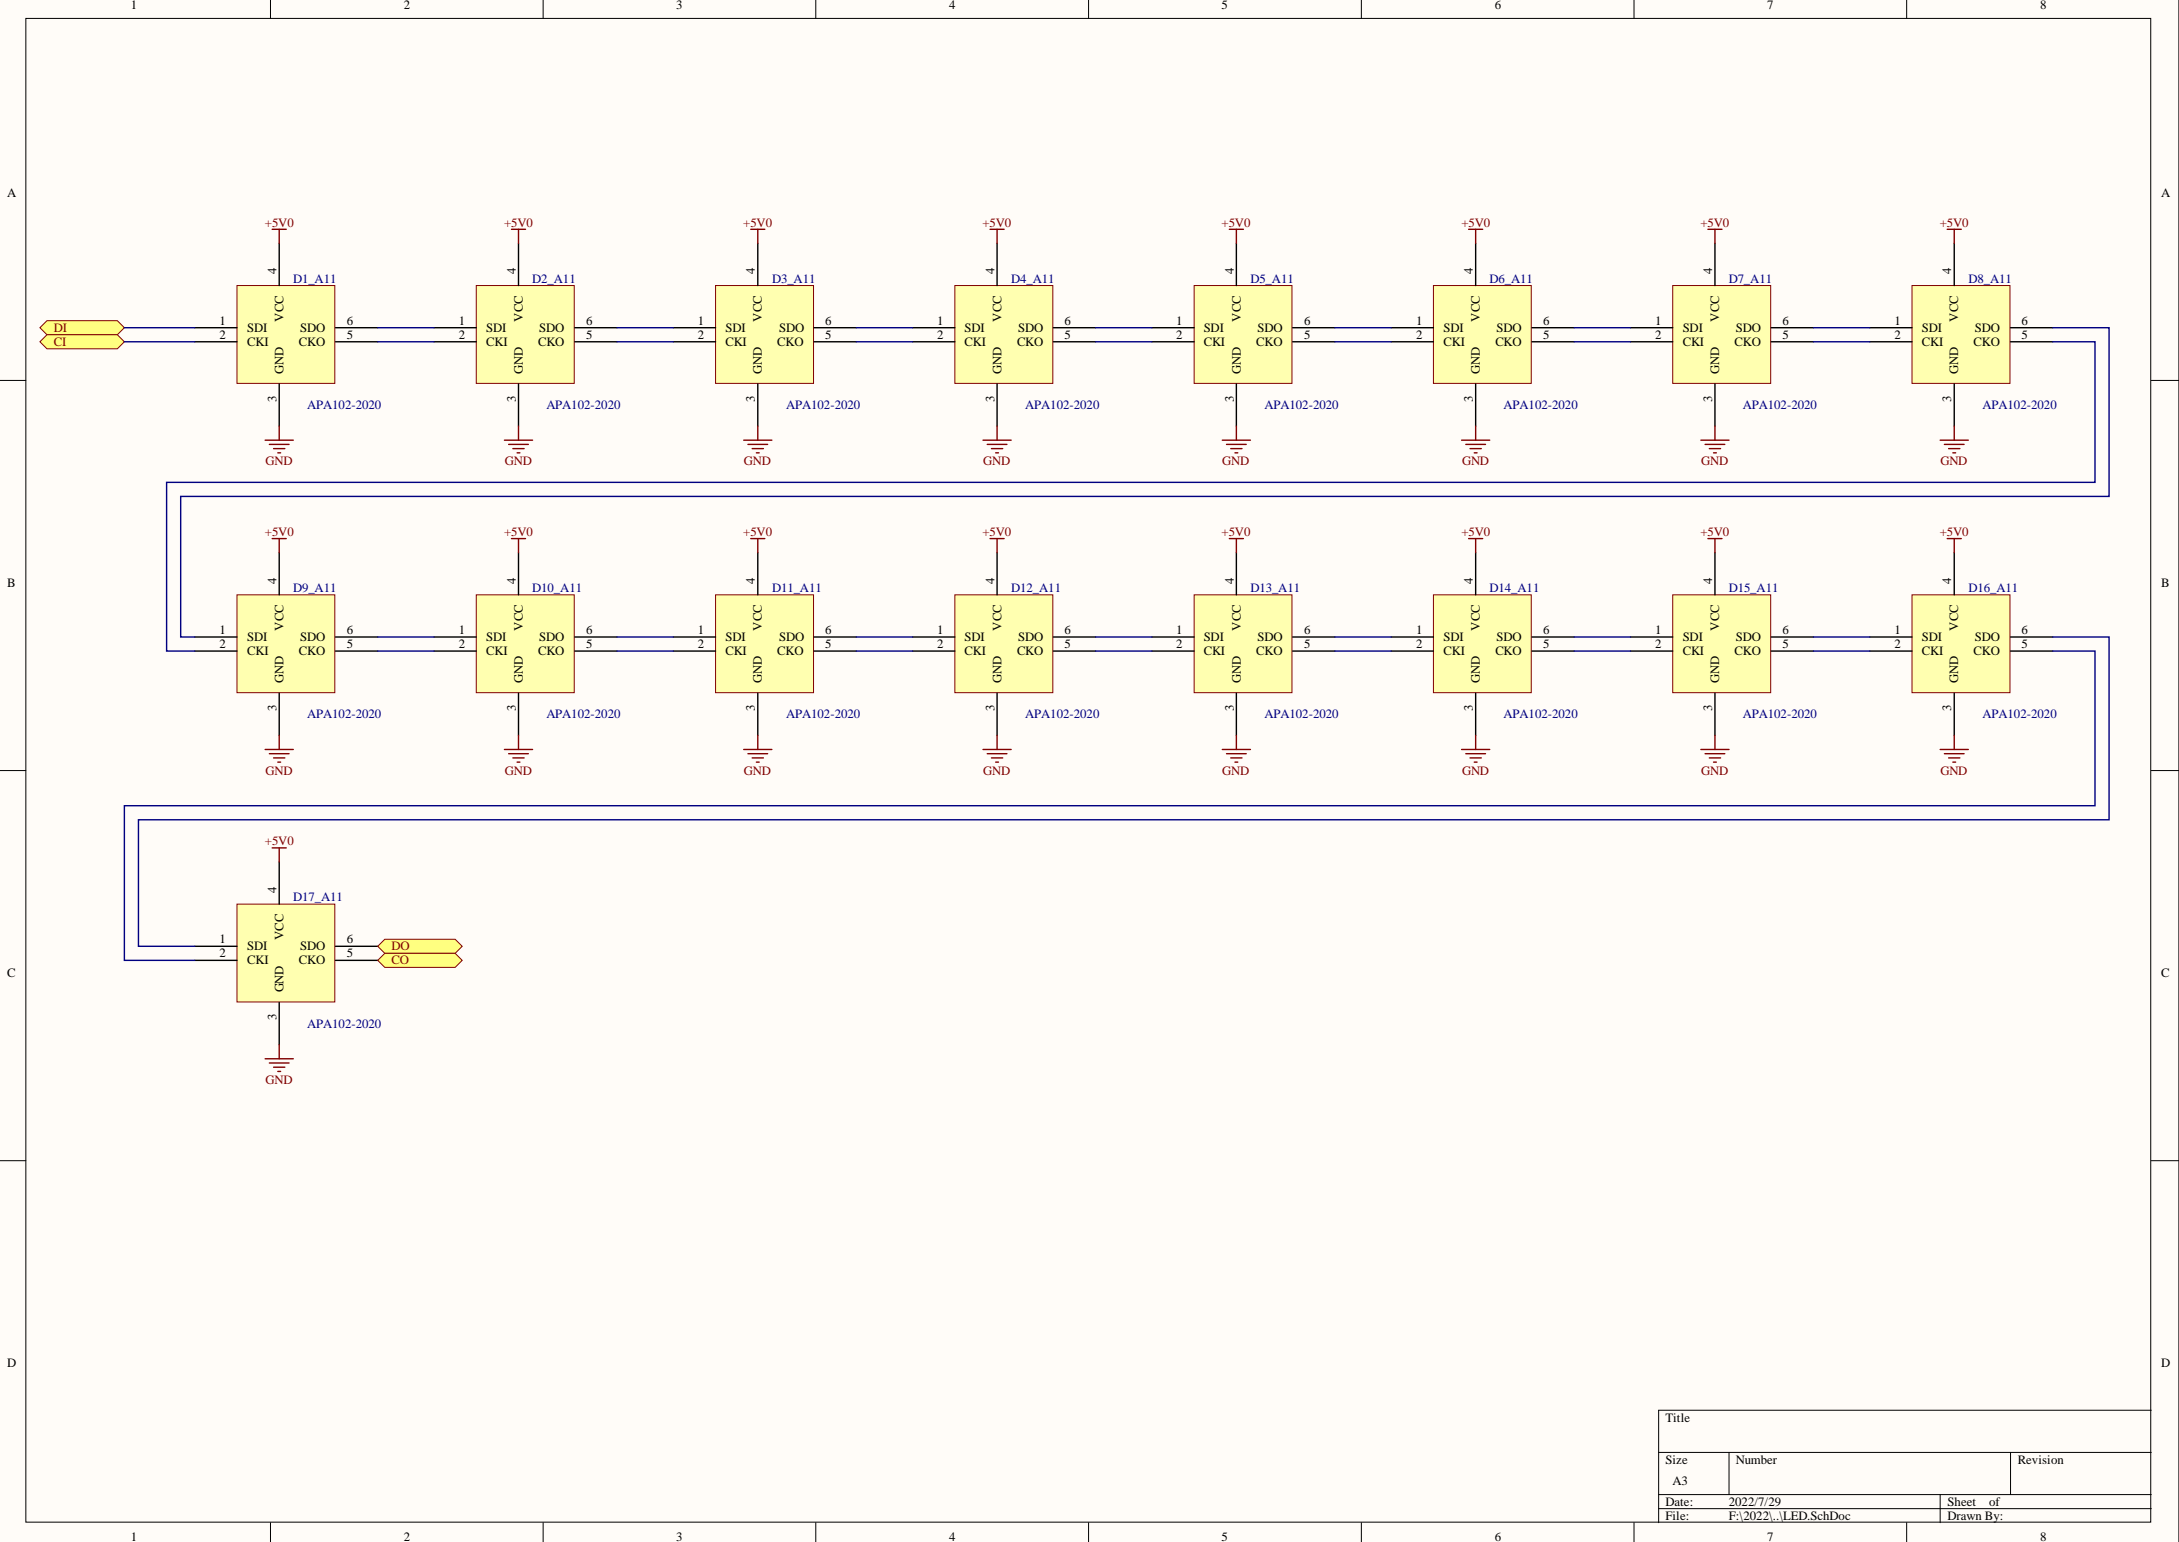

| Title          |                                     |                       |
|----------------|-------------------------------------|-----------------------|
| Size<br>A3     | Number                              | Revision              |
| Date:<br>File: | 2022/7/29<br>E:\2022\...\LED.SchDoc | Sheet of<br>Drawn By: |

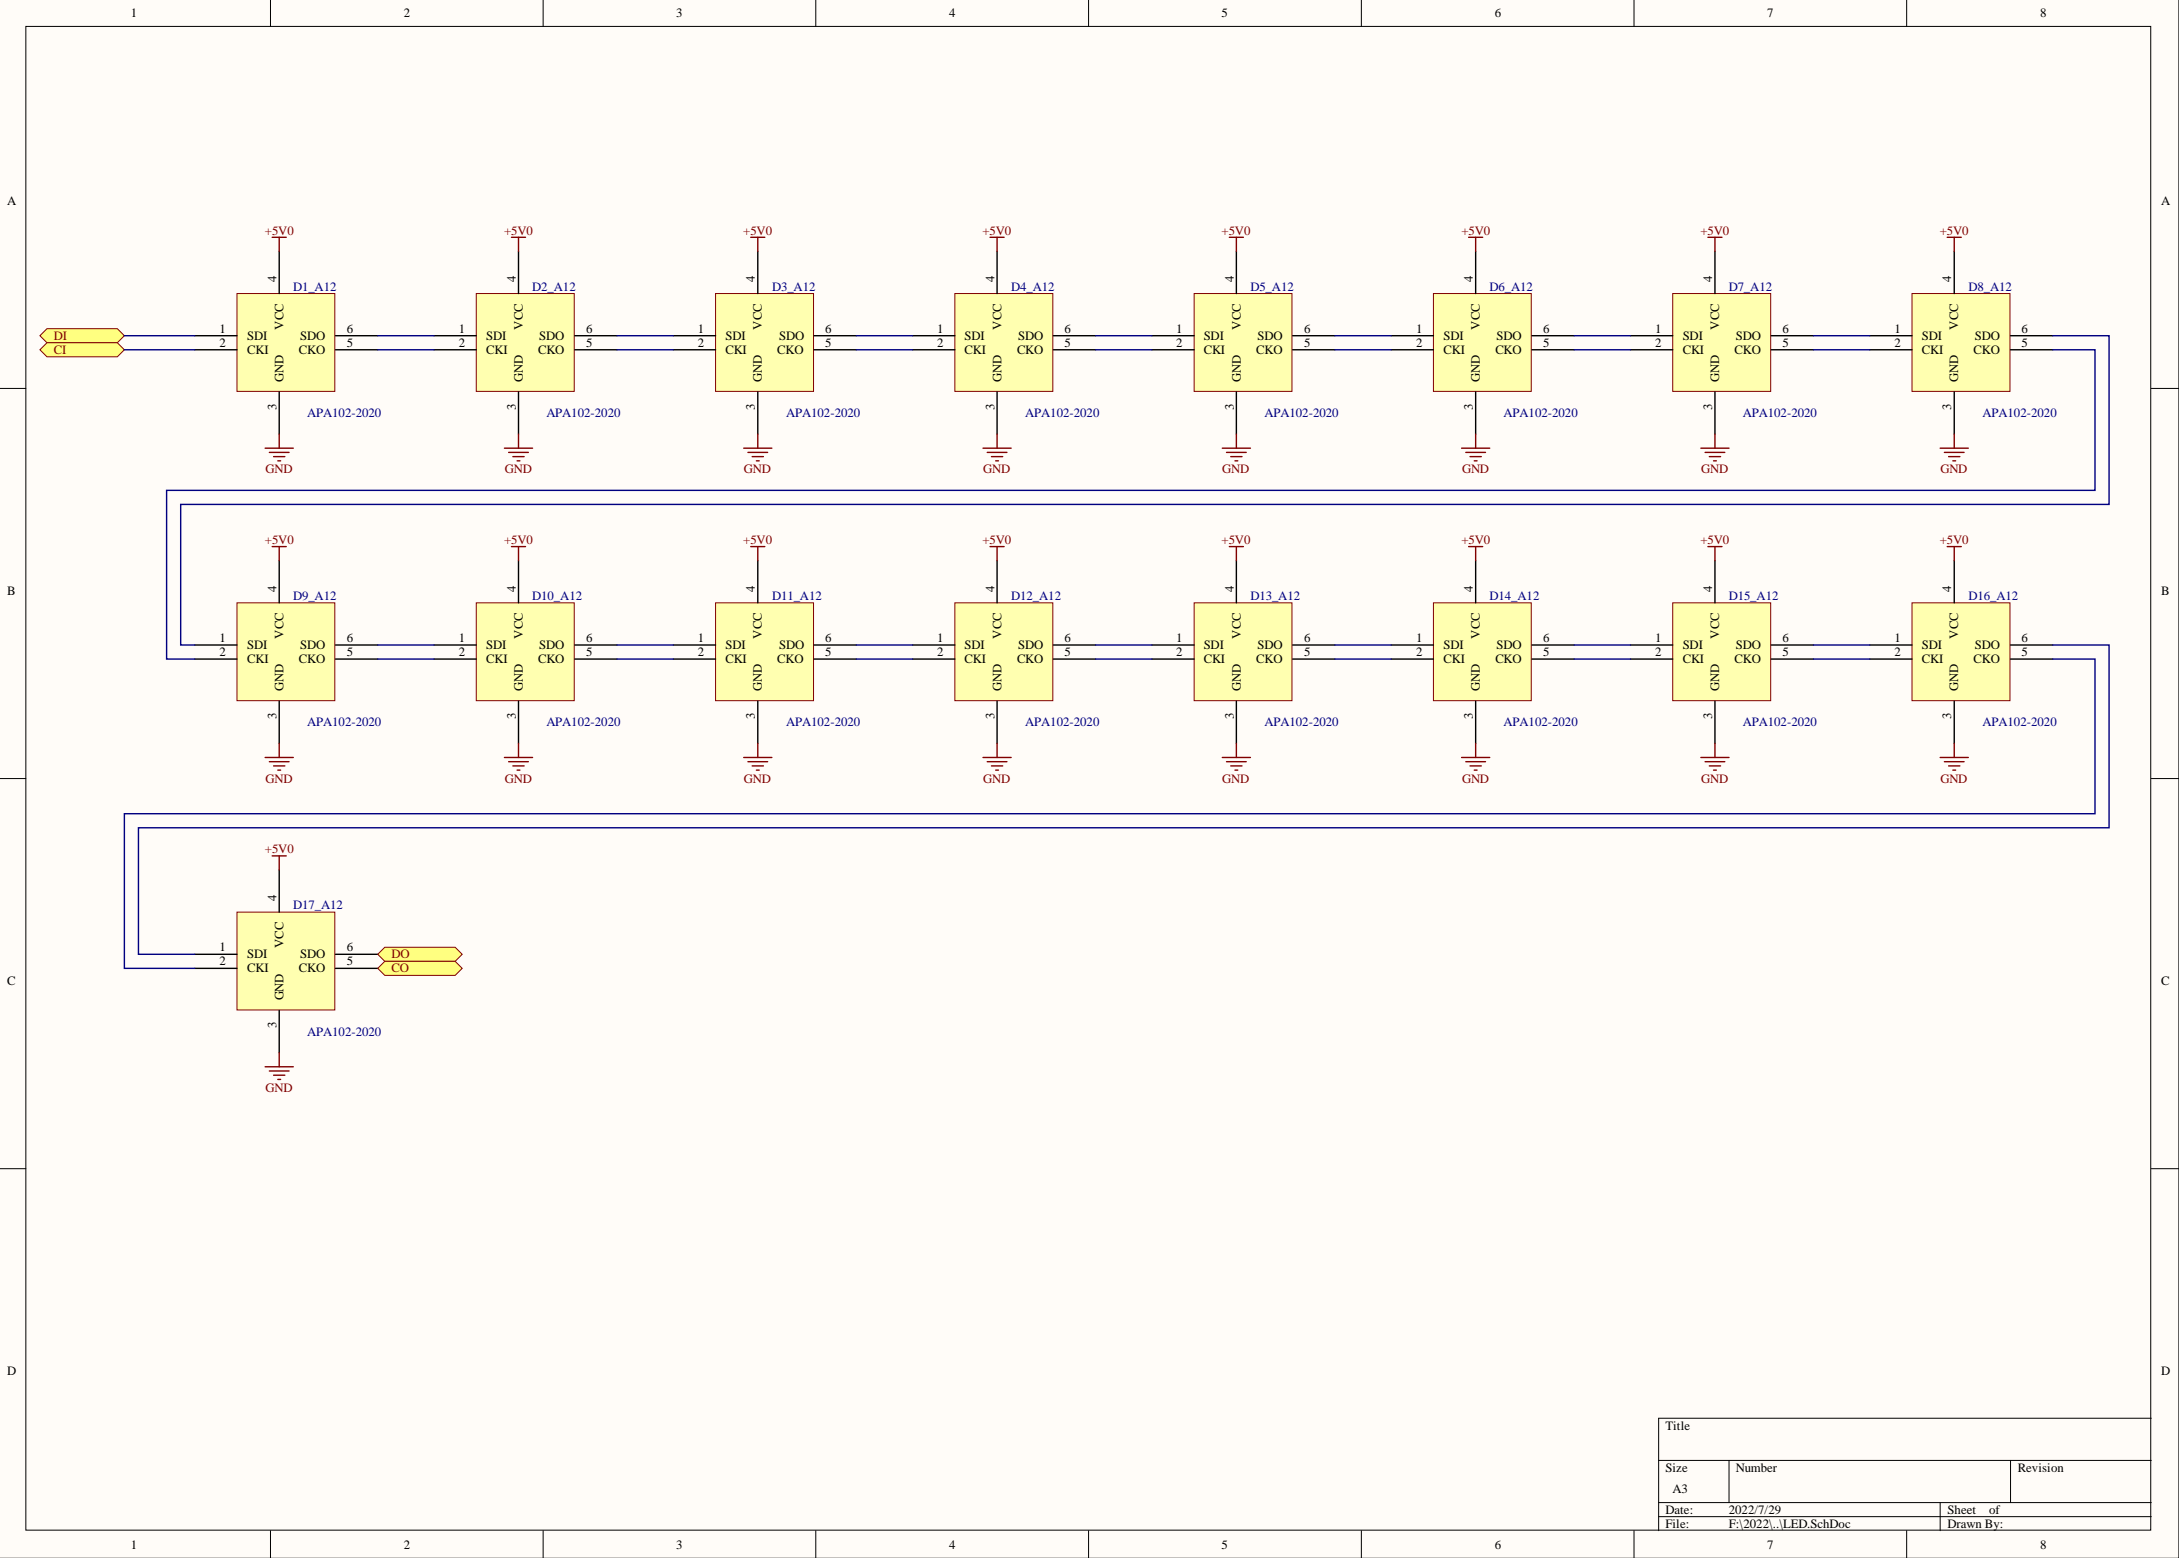

| Title |                        |           |
|-------|------------------------|-----------|
| Size  | Number                 | Revision  |
| A3    |                        |           |
| Date: | 2022/7/29              | Sheet of  |
| File: | F:\2022\...\LED.SchDoc | Drawn By: |

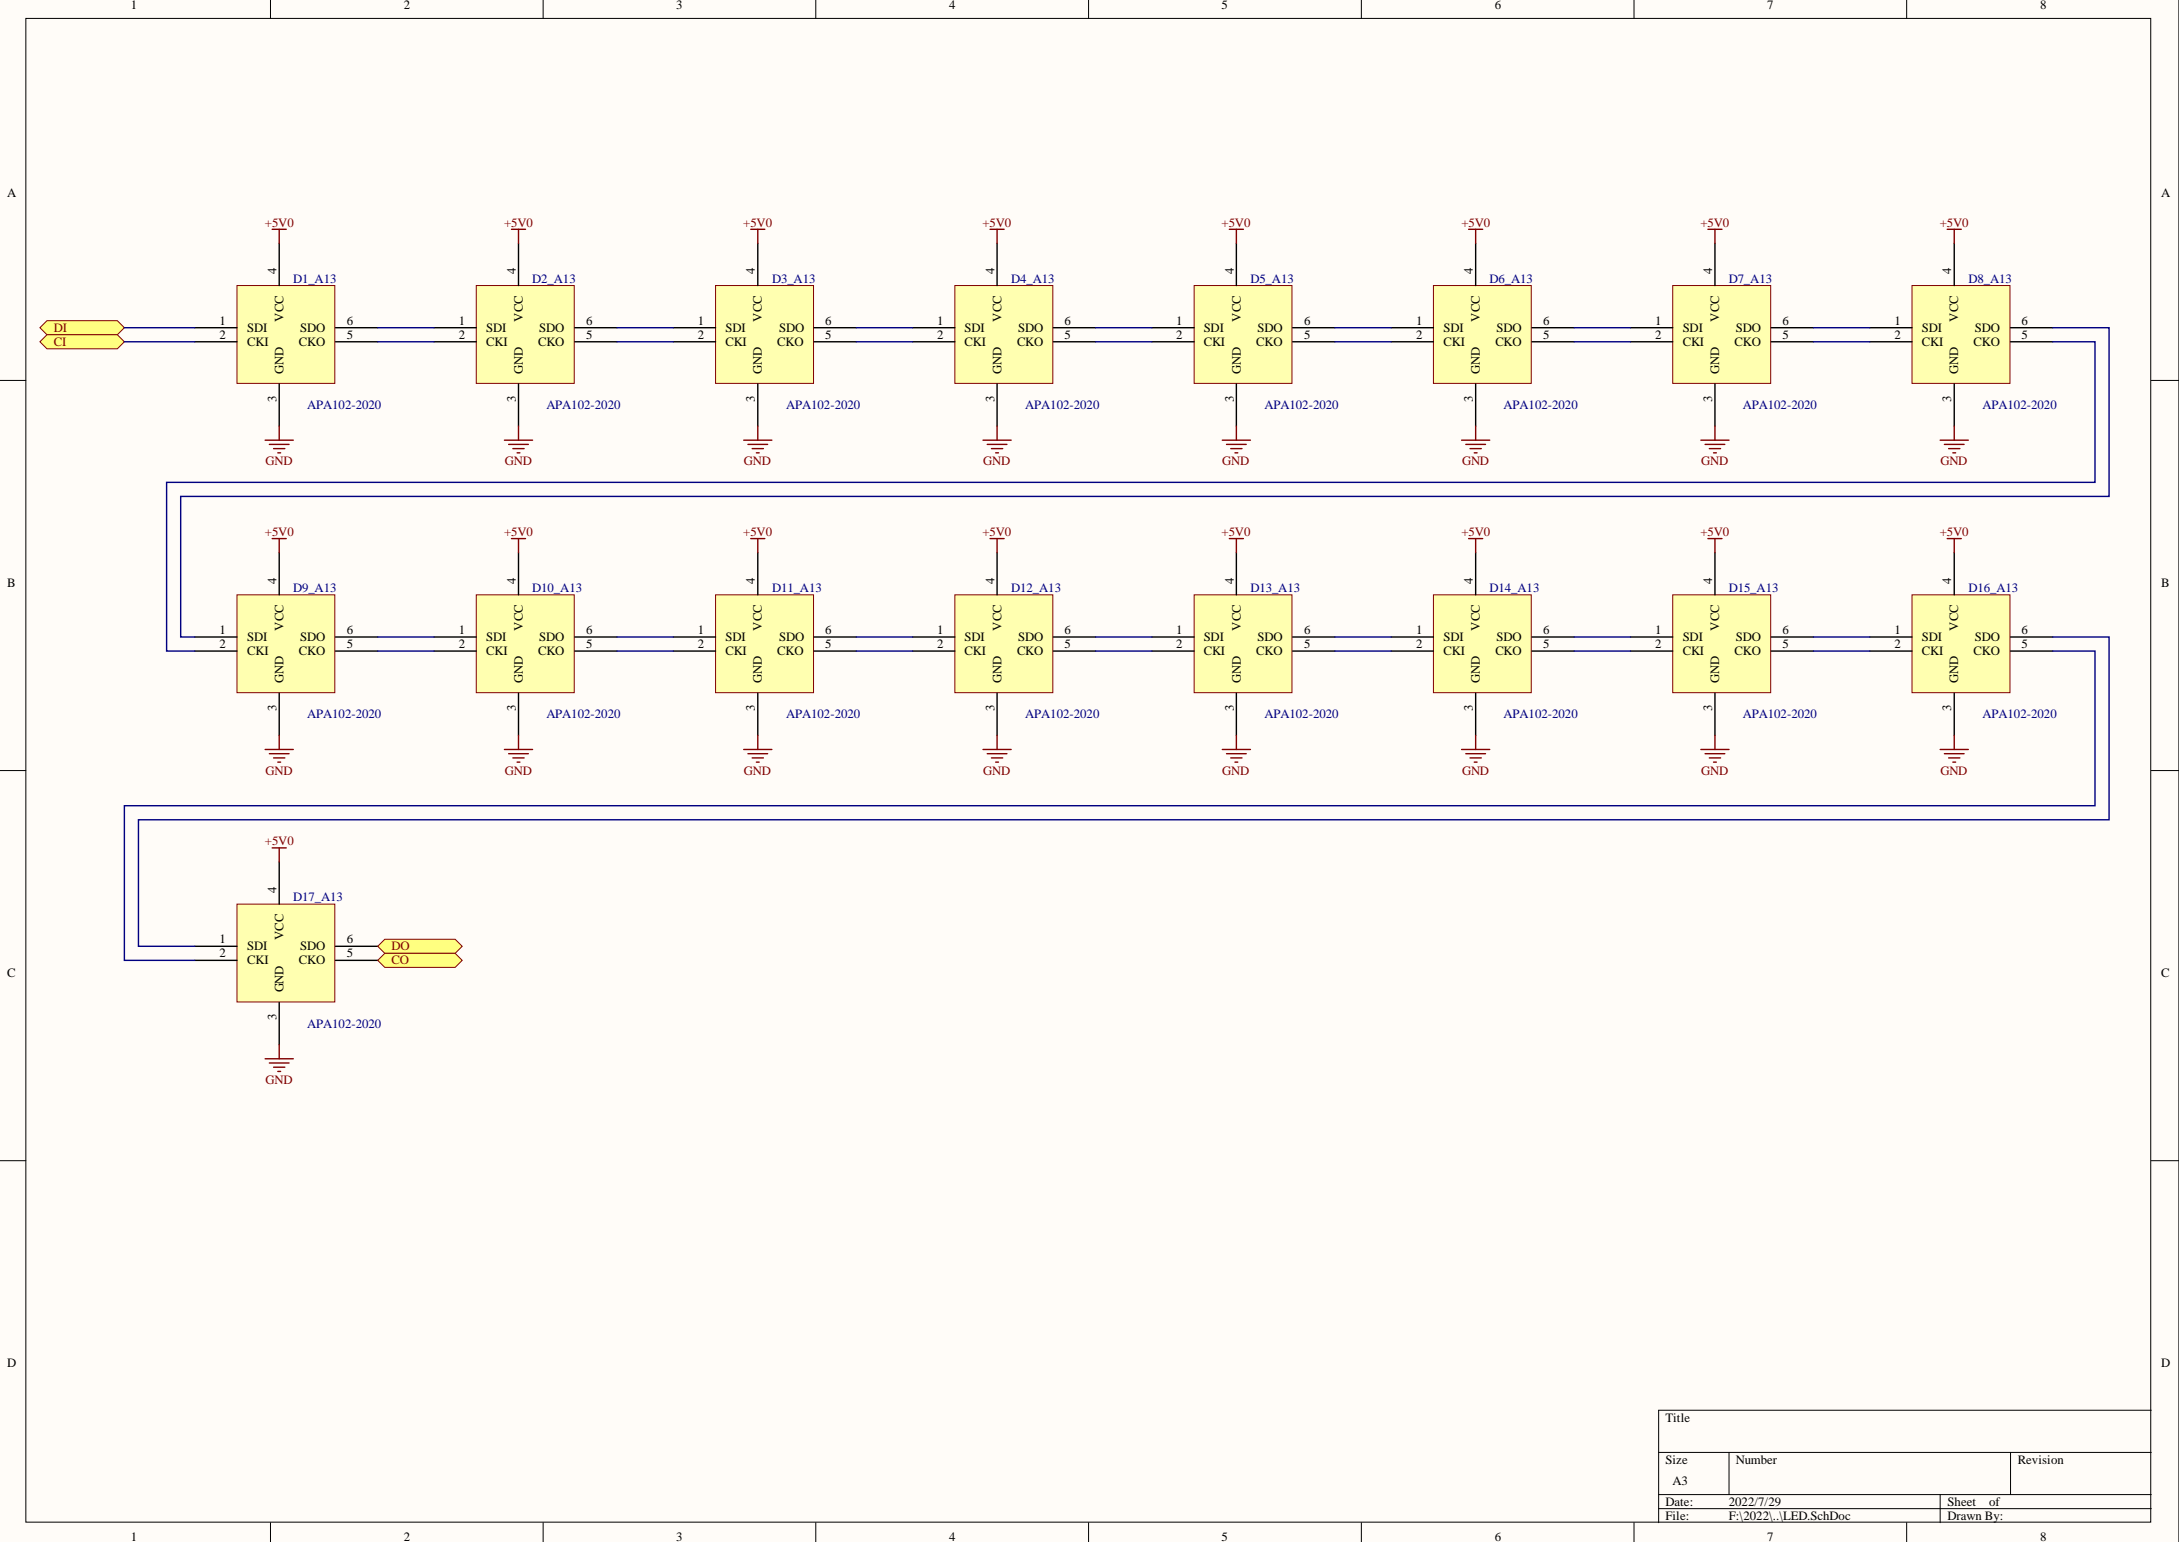

| Title          |                                     |                       |
|----------------|-------------------------------------|-----------------------|
| Size<br>A3     | Number                              | Revision              |
| Date:<br>File: | 2022/7/29<br>F:\2022\...\LED.SchDoc | Sheet of<br>Drawn By: |

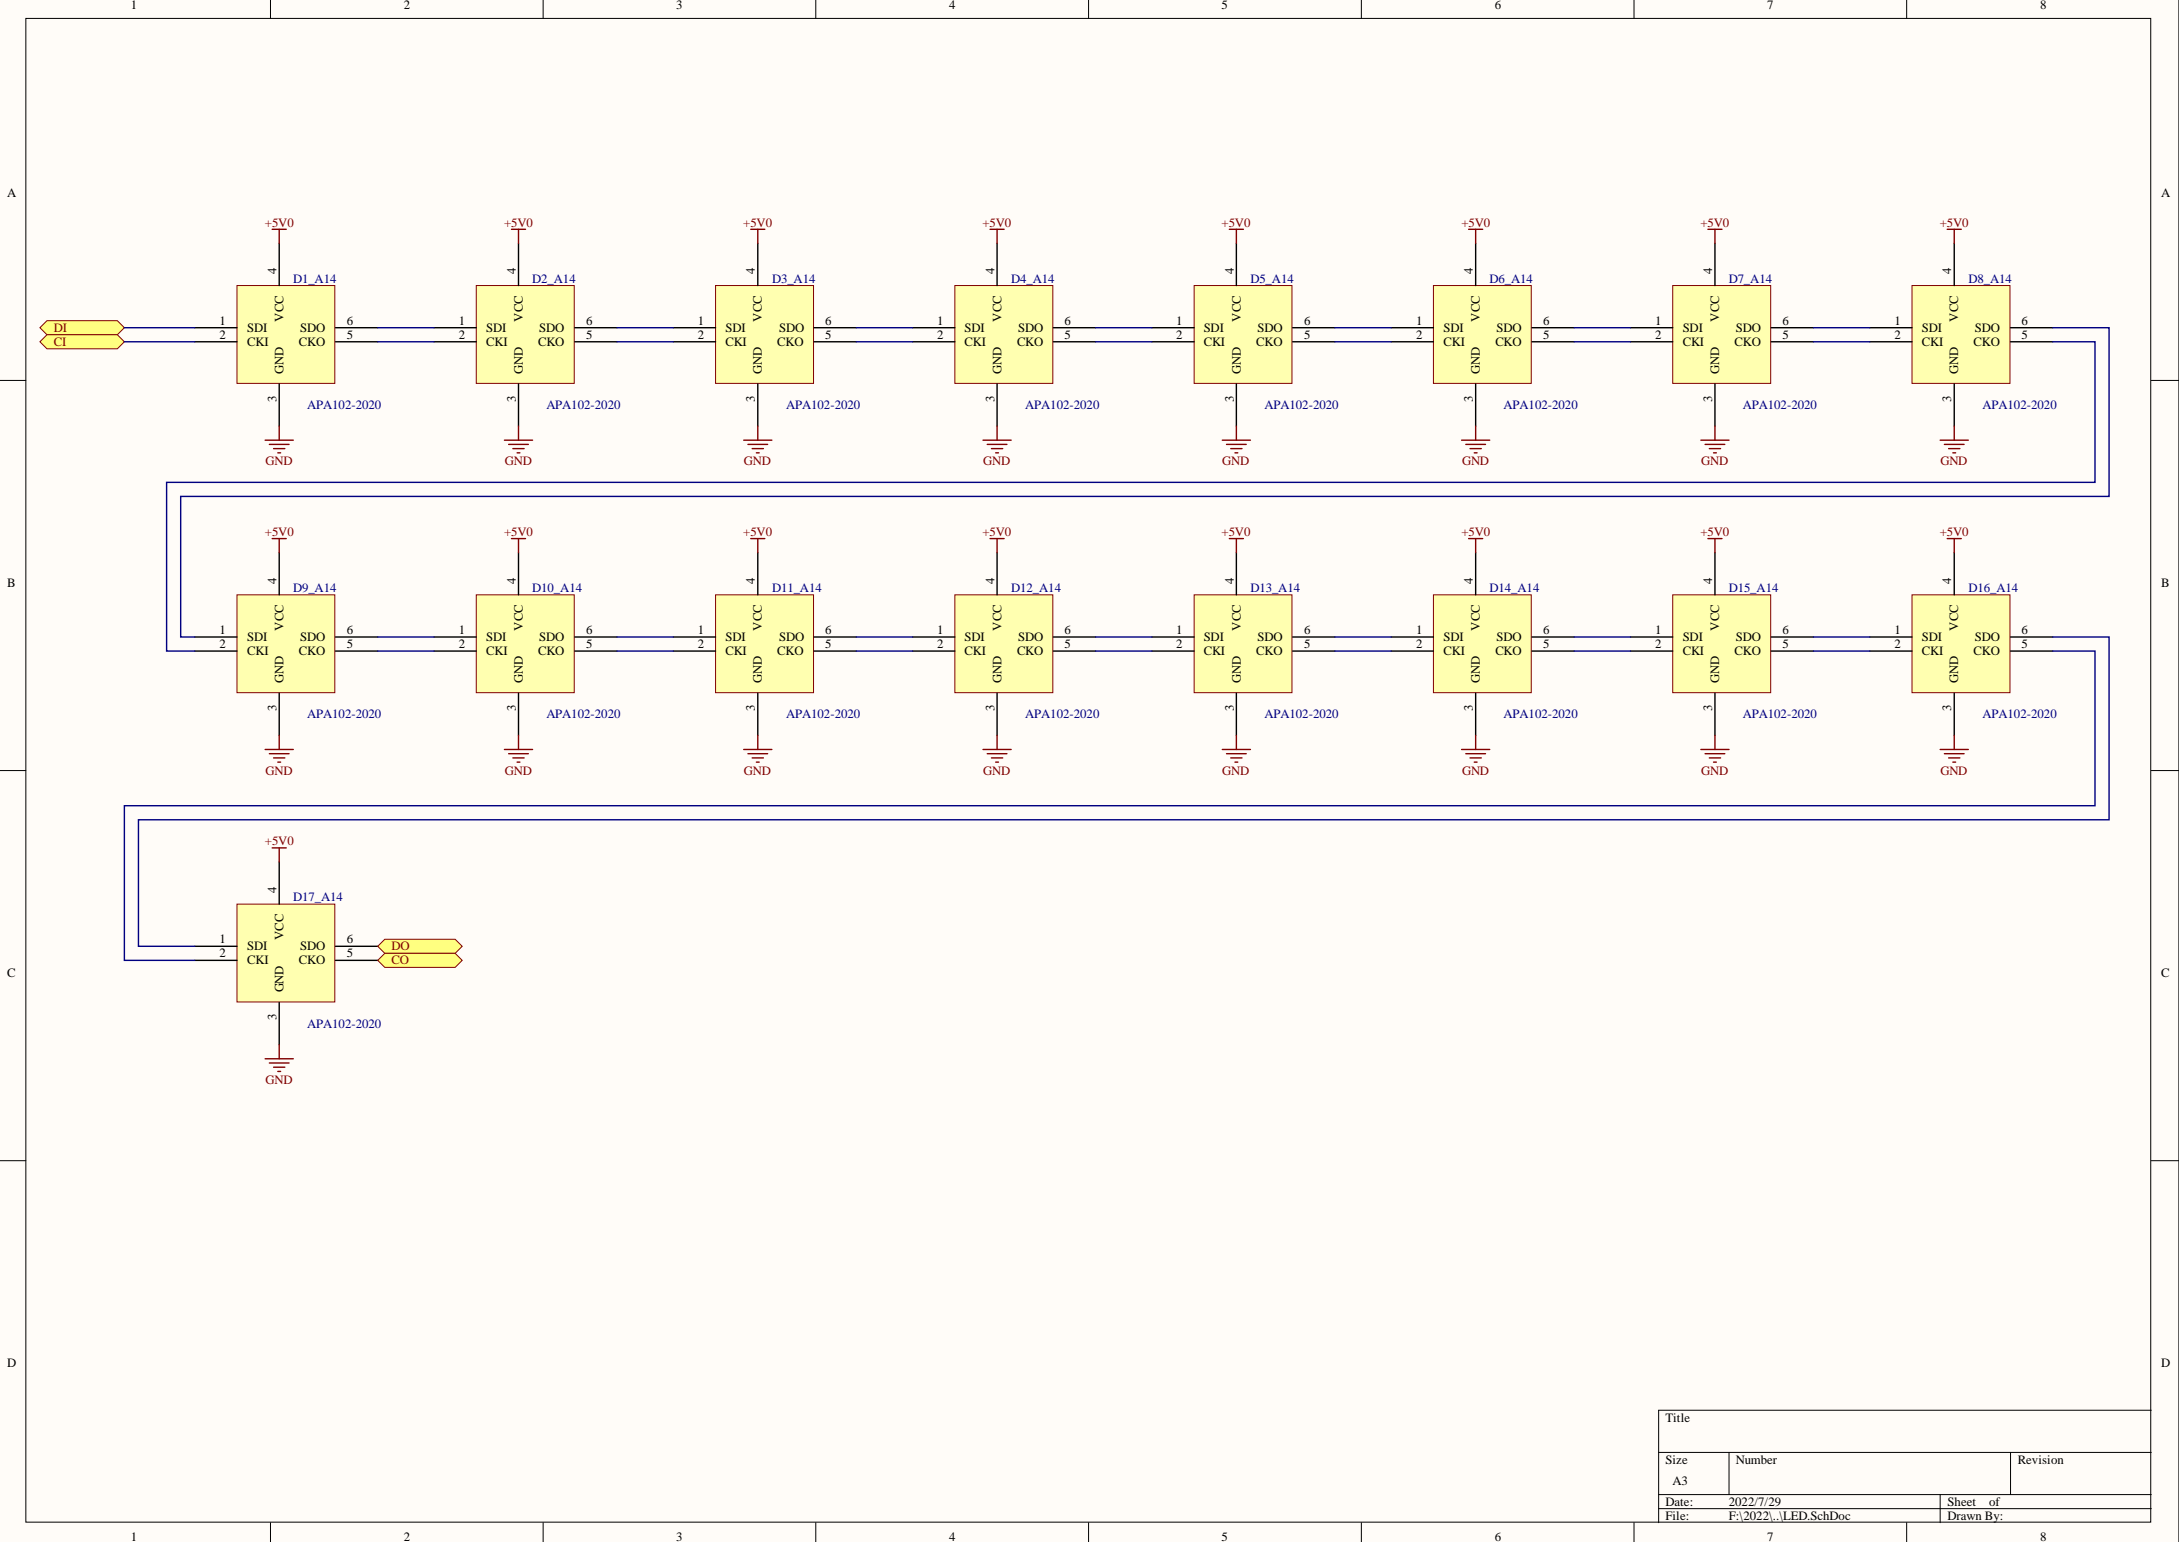

| Title                        |        |           |
|------------------------------|--------|-----------|
| Size<br>A3                   | Number | Revision  |
| Date: 2022/7/29              |        | Sheet of  |
| File: F:\2022\...\LED.SchDoc |        | Drawn By: |

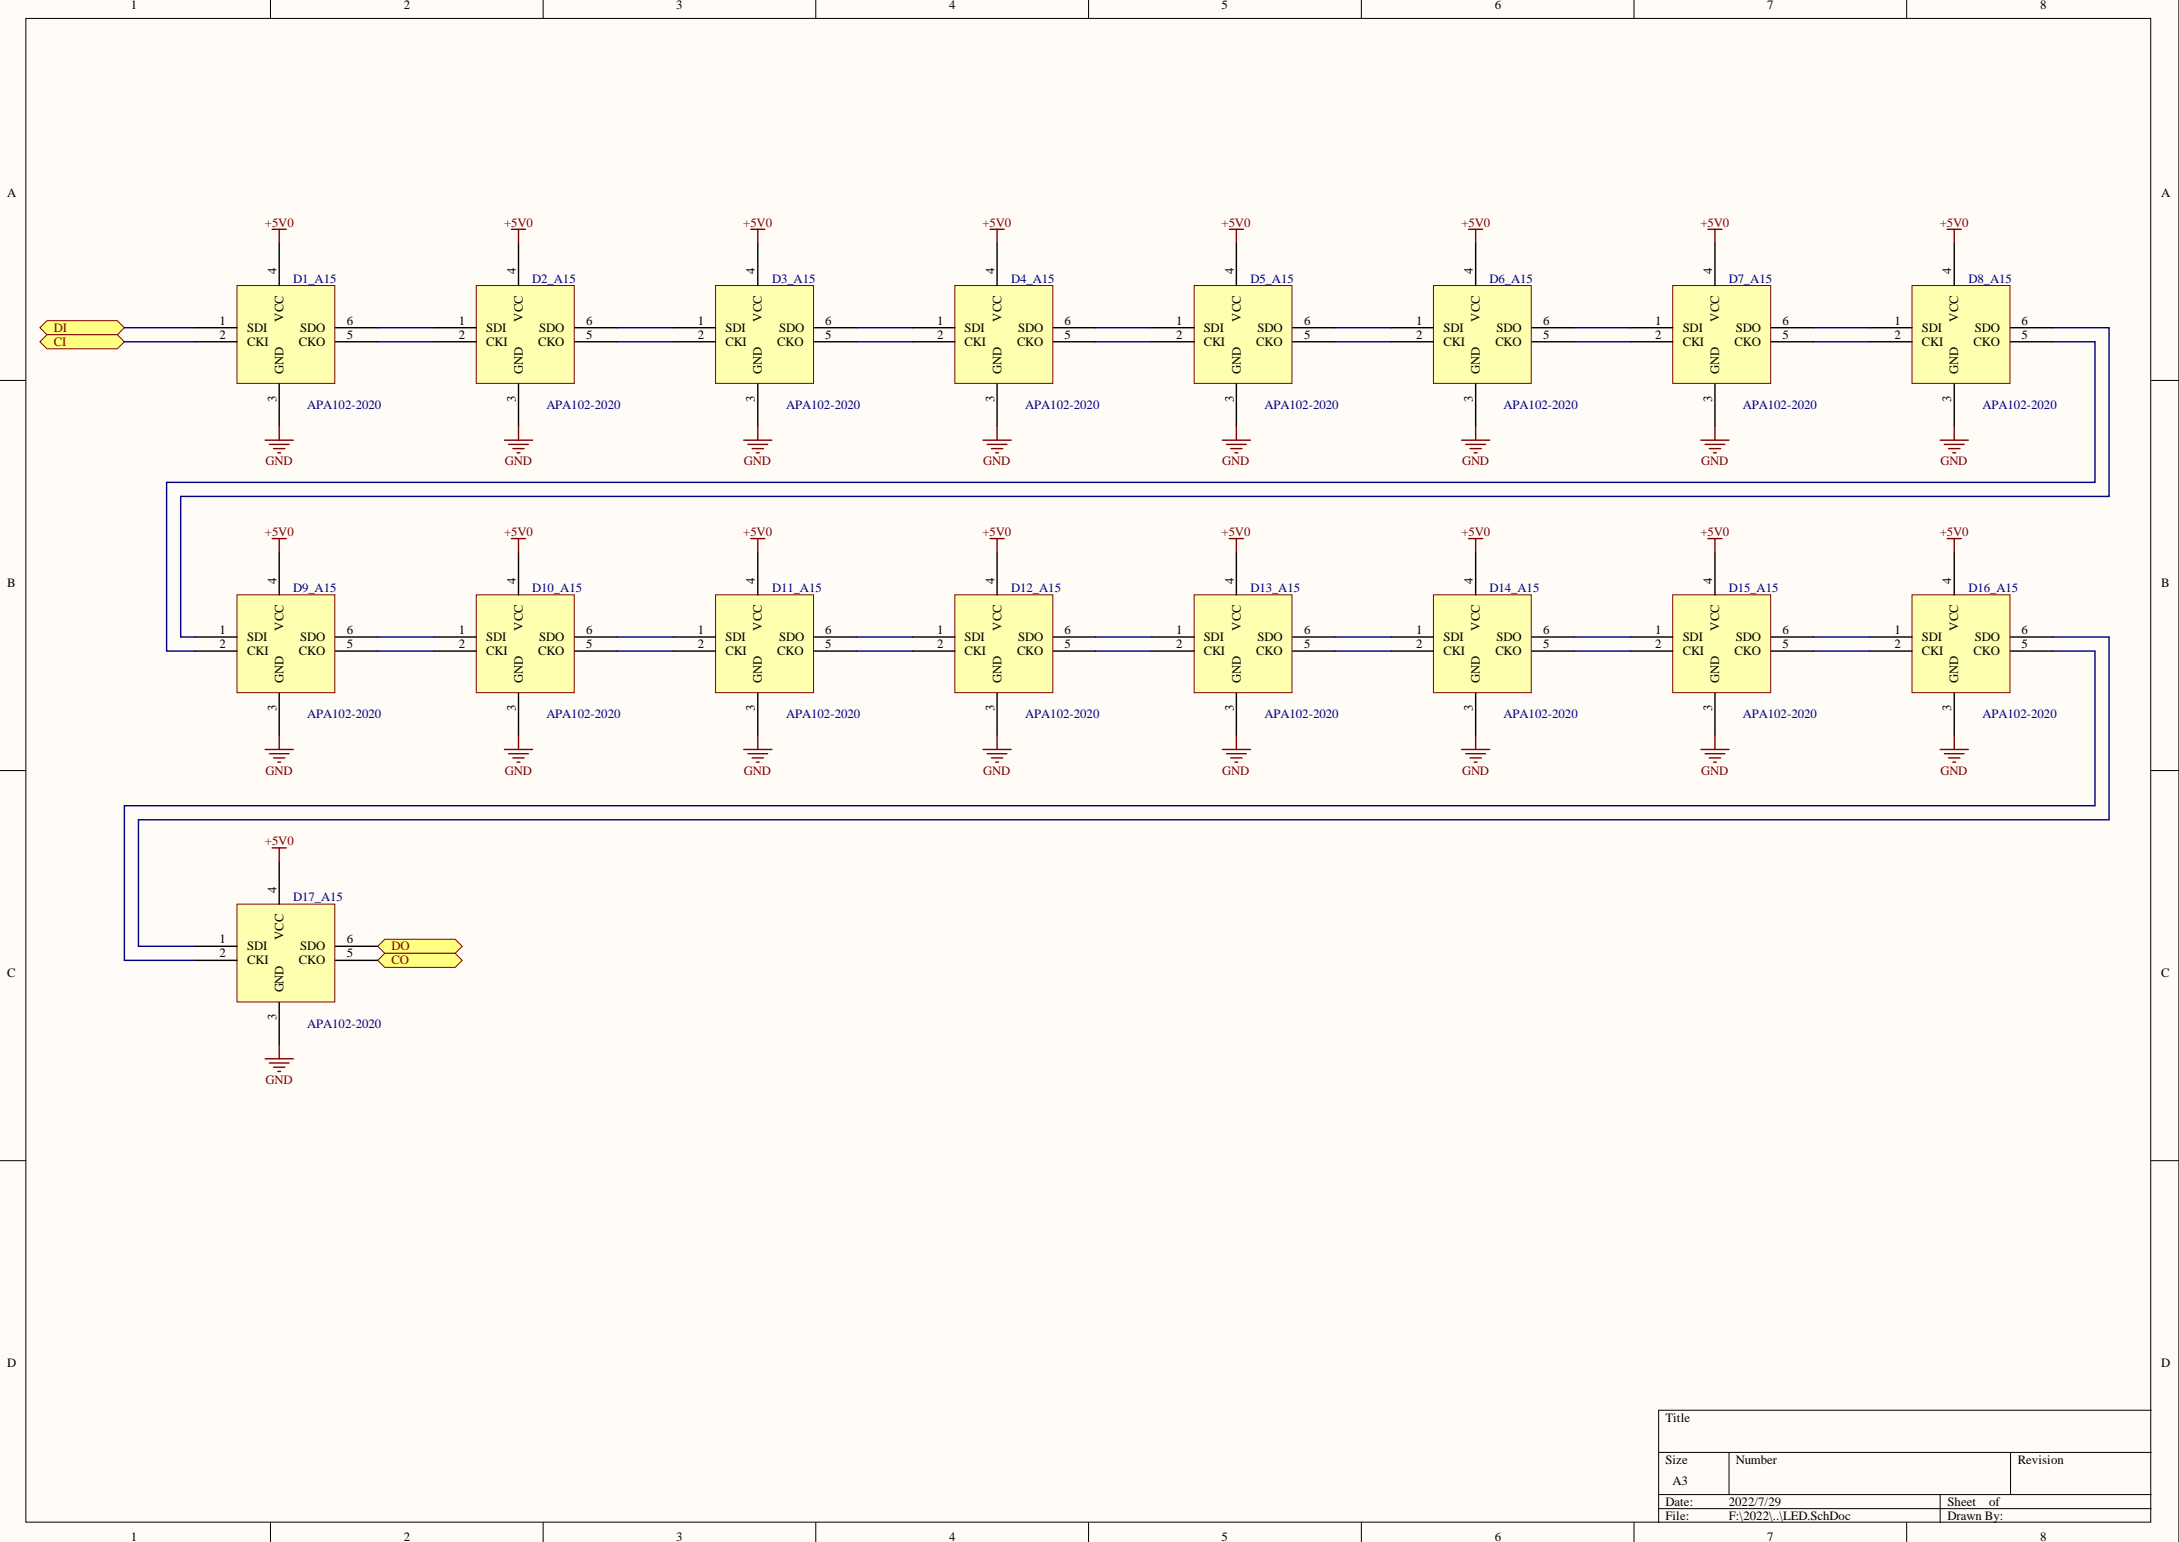

| Title          |                                     |                       |
|----------------|-------------------------------------|-----------------------|
| Size<br>A3     | Number                              | Revision              |
| Date:<br>File: | 2022/7/29<br>F:\2022\...\LED.SchDoc | Sheet of<br>Drawn By: |

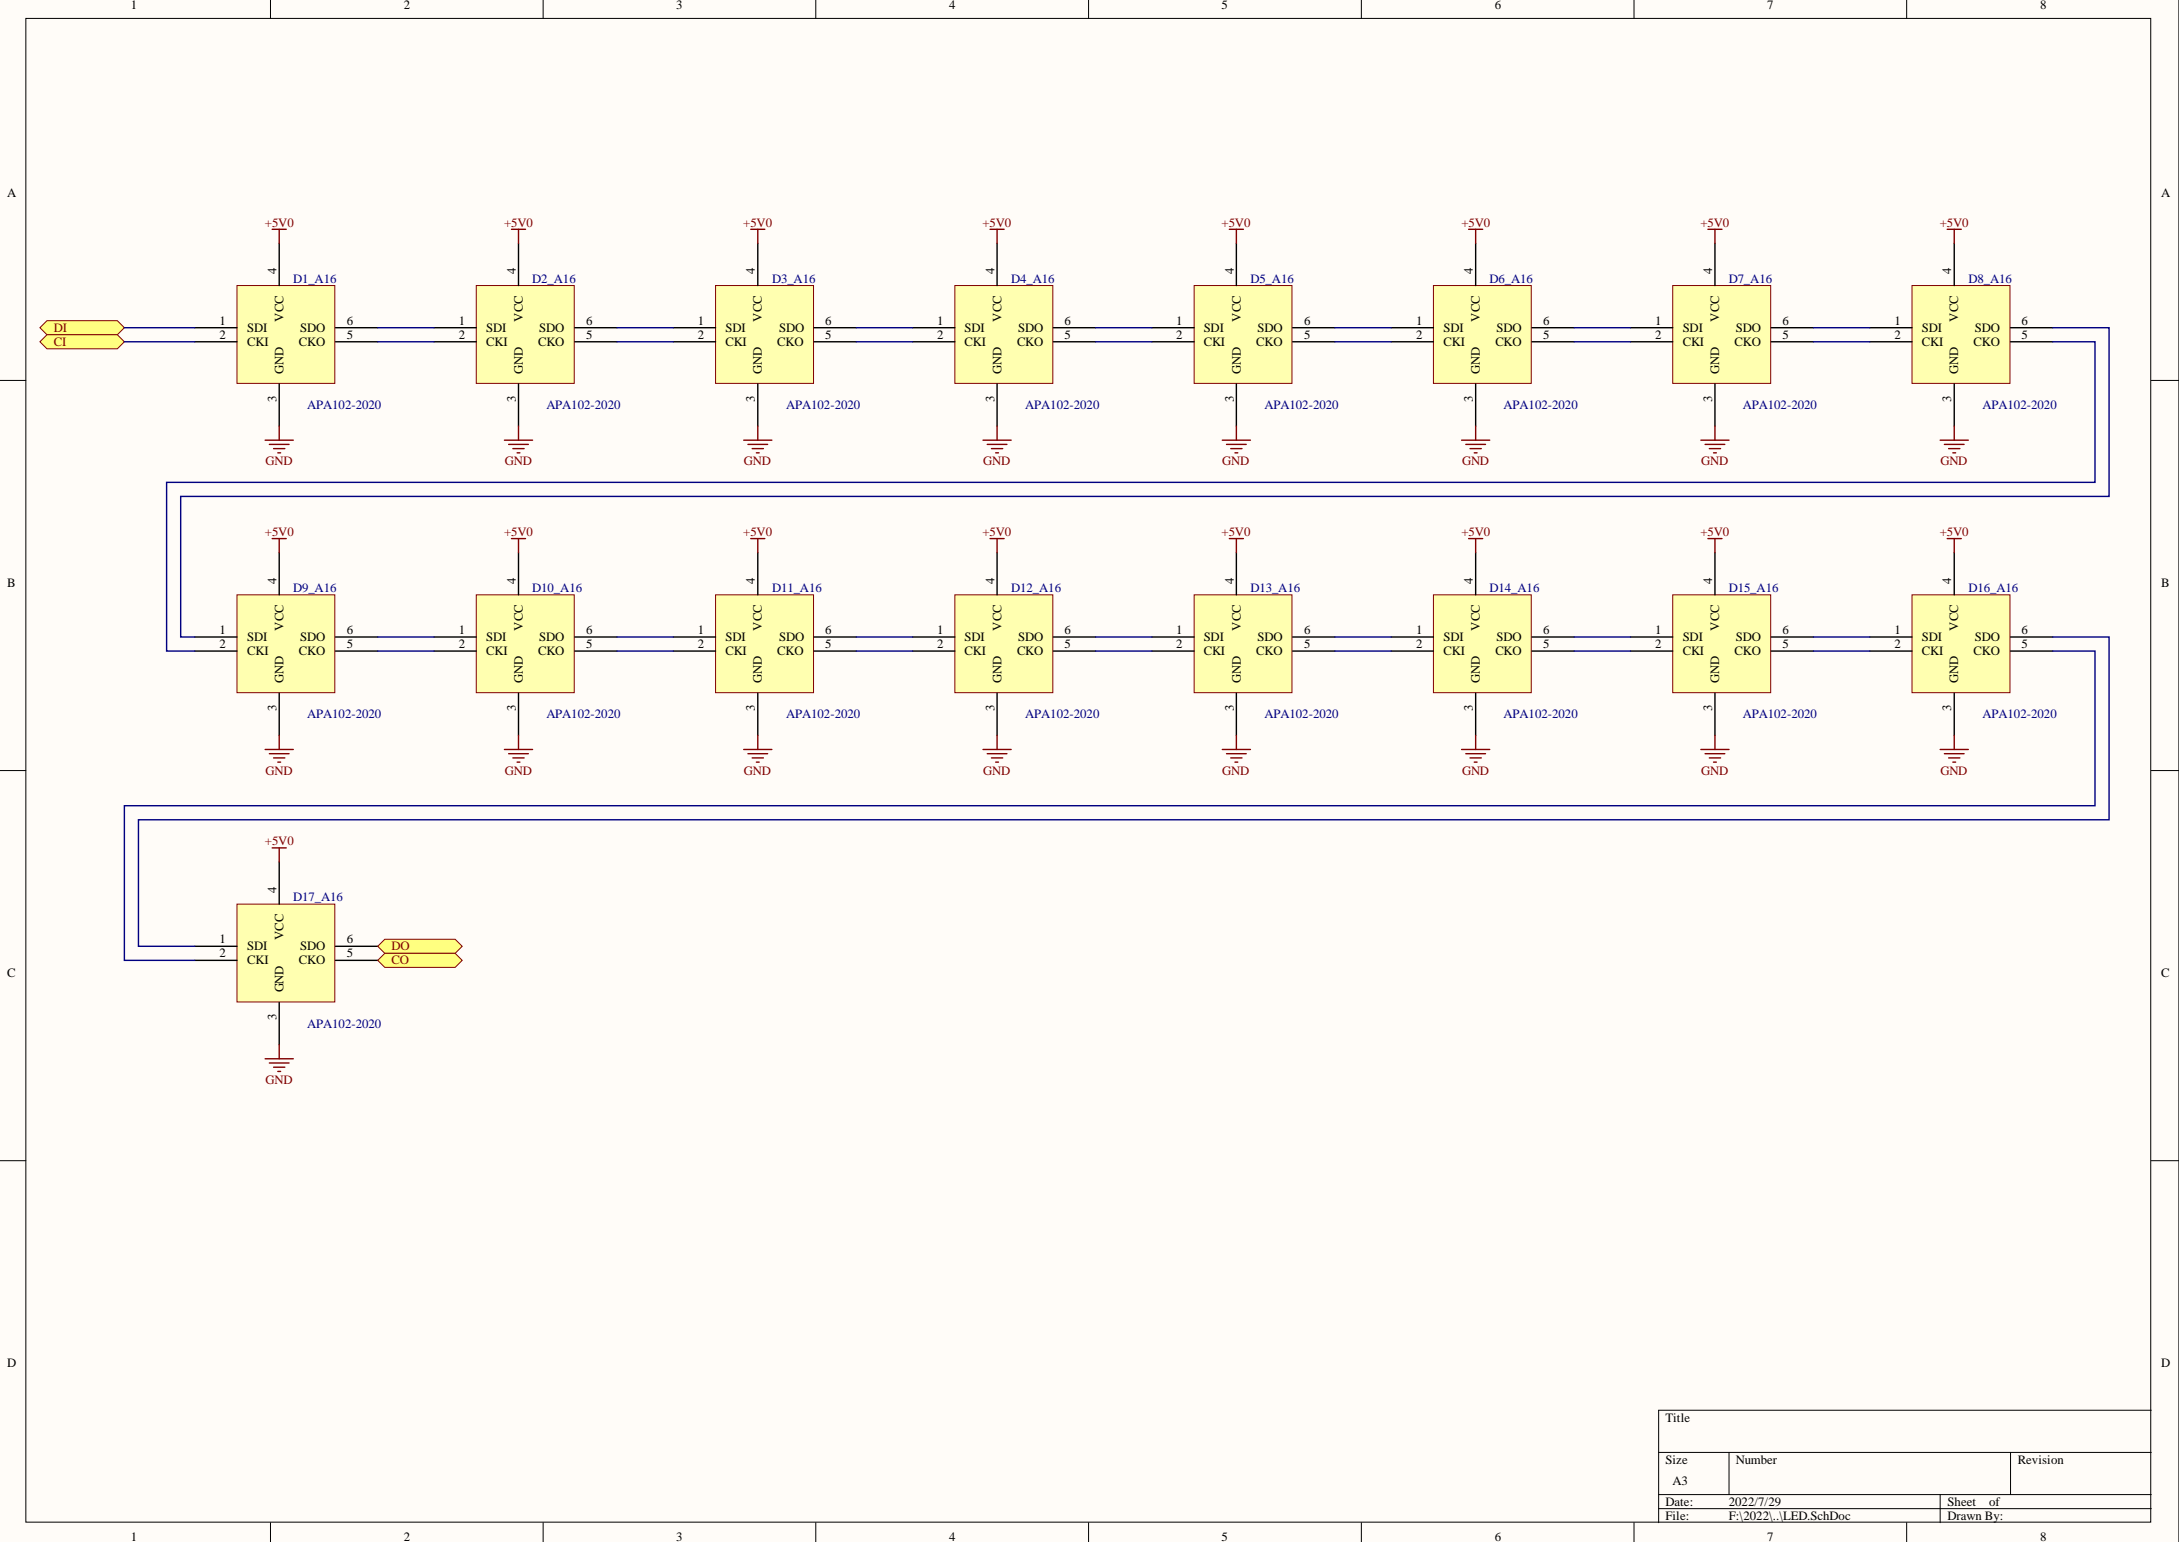

| Title          |                                     |                       |
|----------------|-------------------------------------|-----------------------|
| Size<br>A3     | Number                              | Revision              |
| Date:<br>File: | 2022/7/29<br>F:\2022\...\LED.SchDoc | Sheet of<br>Drawn By: |



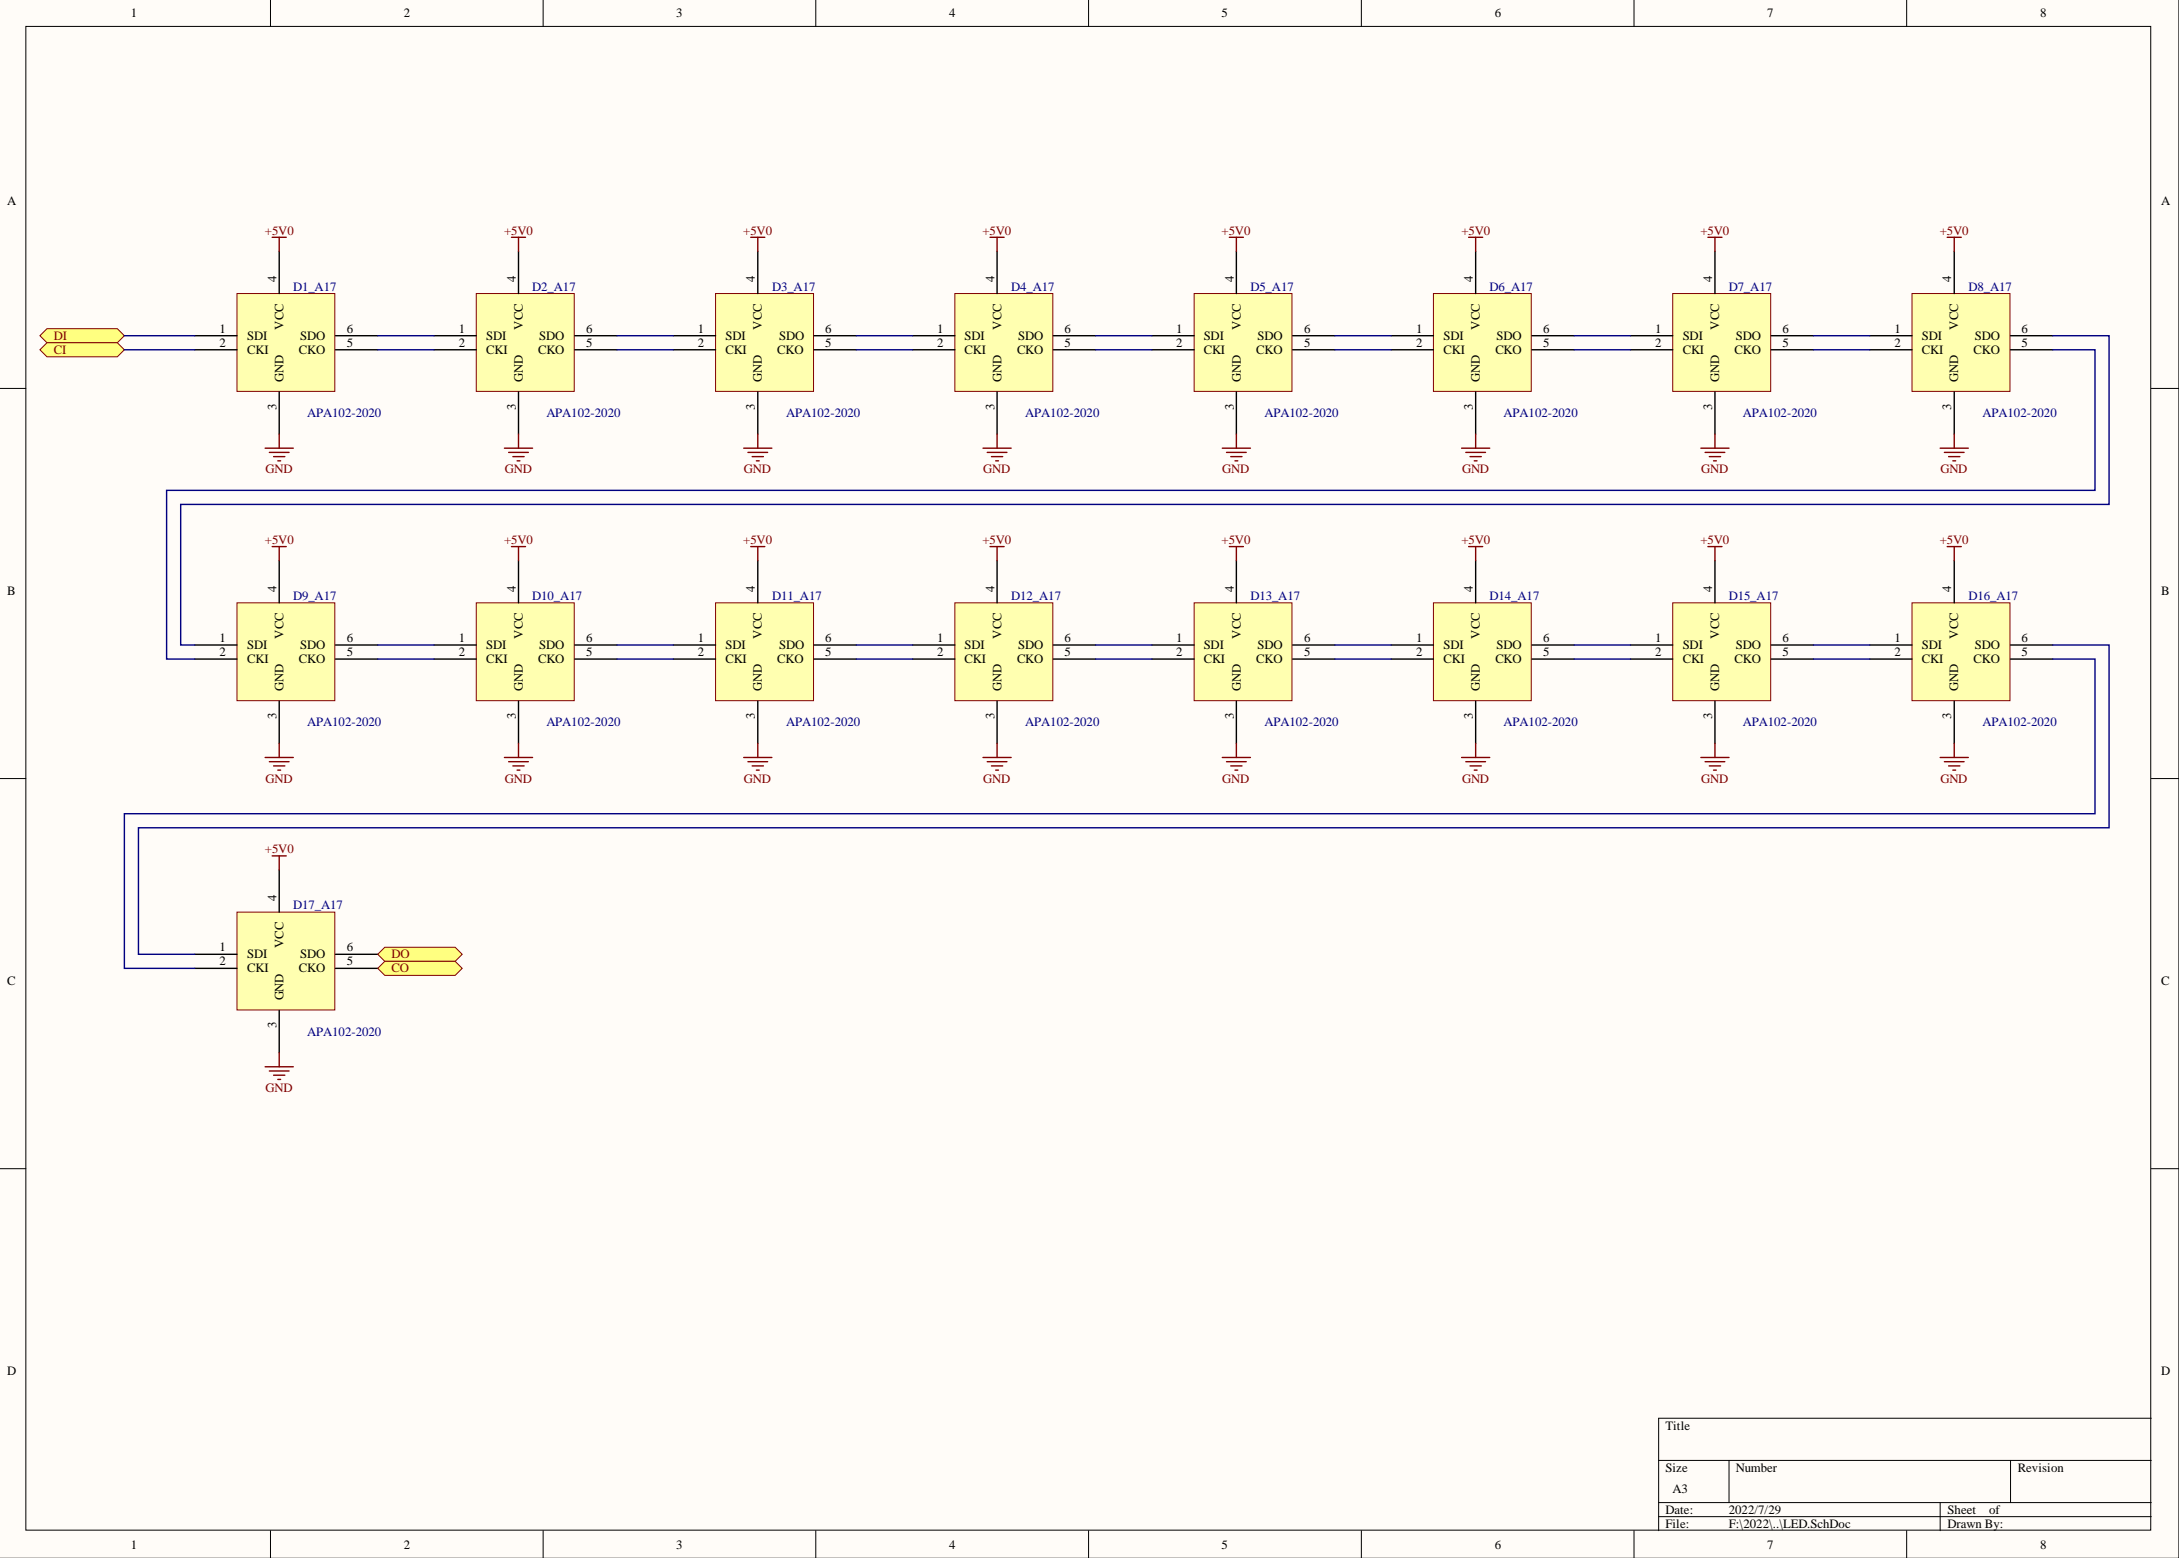

| Title          |                                     |                       |
|----------------|-------------------------------------|-----------------------|
| Size<br>A3     | Number                              | Revision              |
| Date:<br>File: | 2022/7/29<br>F:\2022\...\LED.SchDoc | Sheet of<br>Drawn By: |

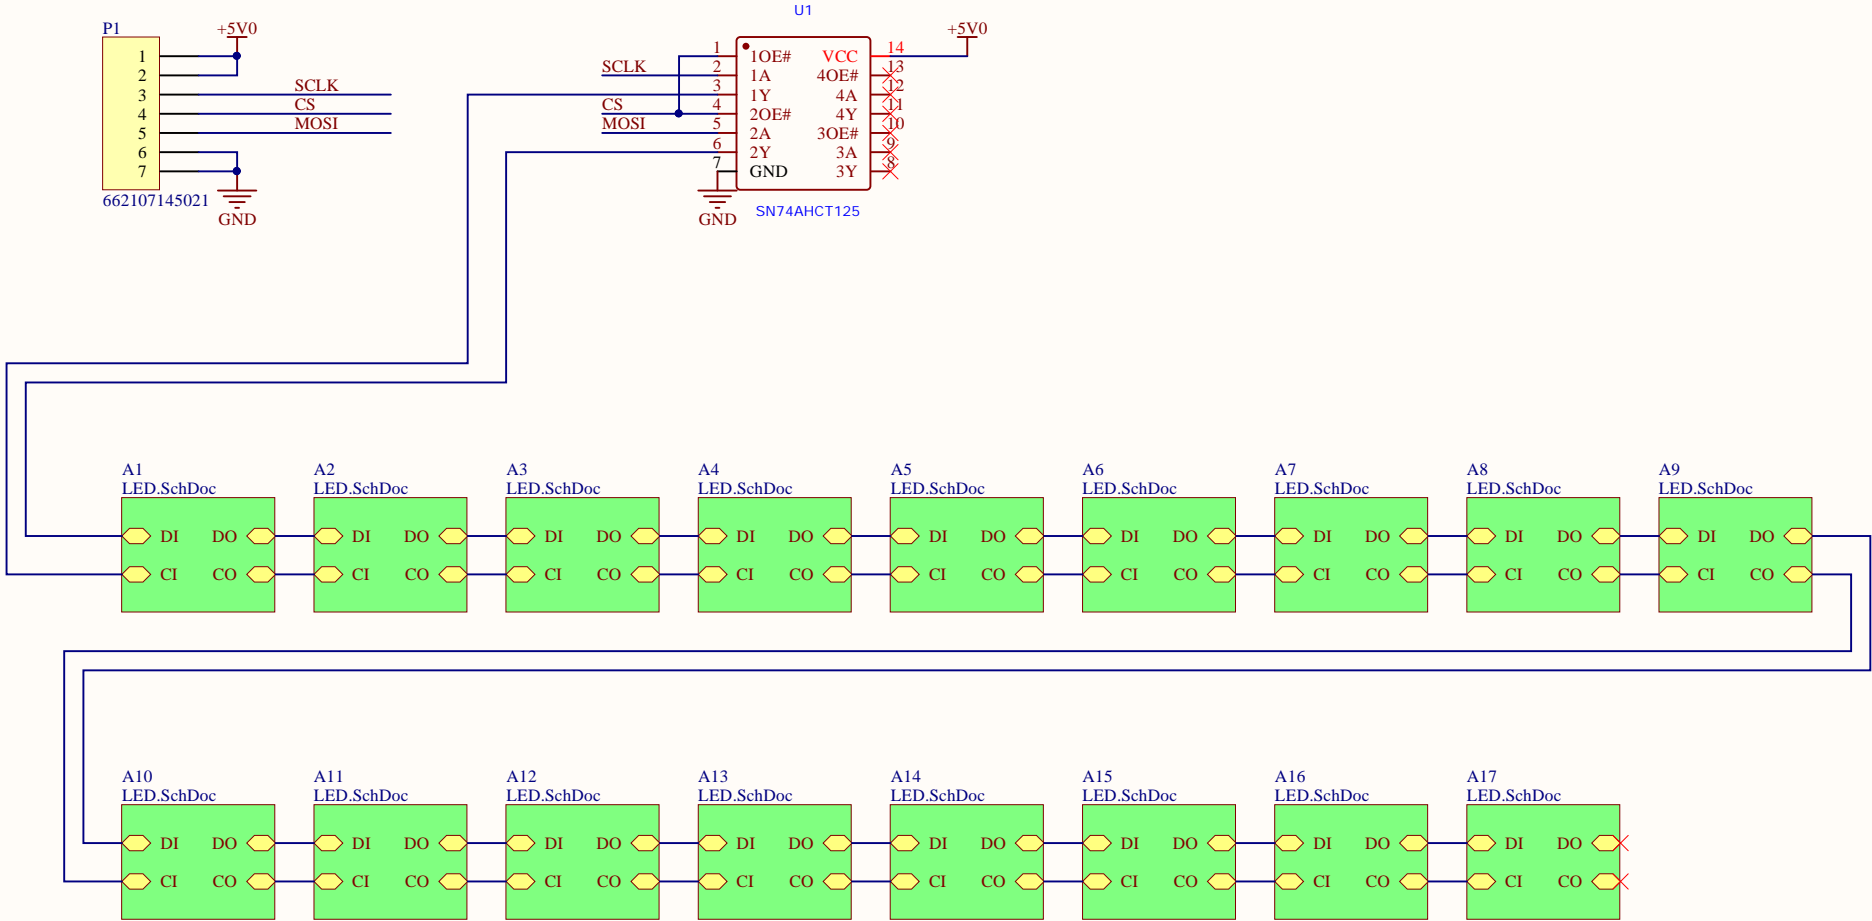

| Title |                     |           |
|-------|---------------------|-----------|
| Size  | Number              | Revision  |
| A4    |                     |           |
| Date: | 2022/7/29           | Sheet of  |
| File: | F:\2022\MAIN.SchDoc | Drawn By: |

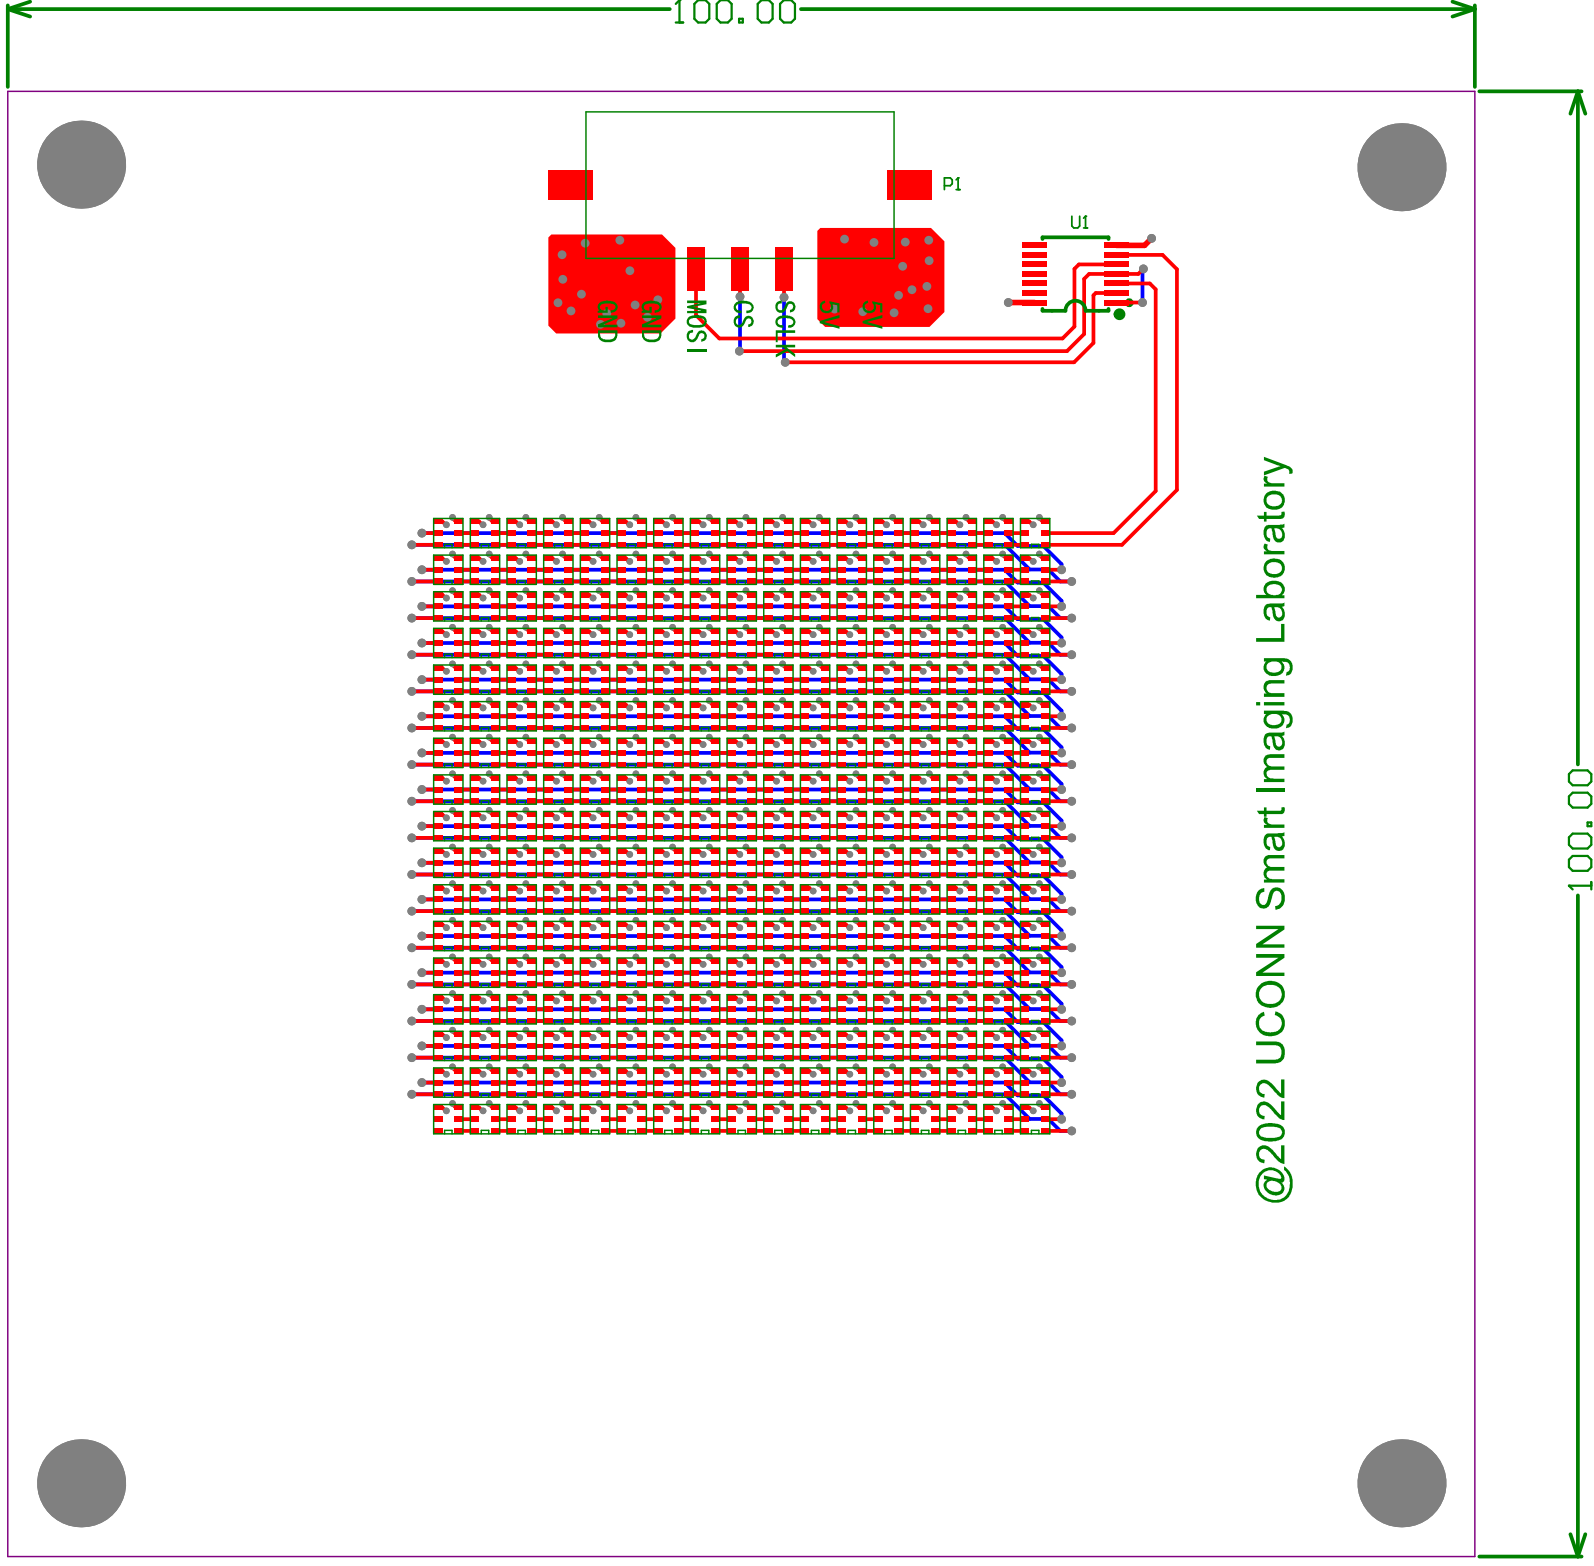

Supplement: MOESM4 [file 41596_2023_829_MOESM4_ESM41.zip]
