# Supplementary material for: Spatial- and Fourier-domain ptychography for high-throughput bio-imaging
Source: Springer Nature journal article supplement (doi:10.1038/s41596-023-00829-4), 2023-05-29
Supplement: MOESM1 [file 41596_2023_829_MOESM1_ESM38.pdf]

---

**Supplementary information**

---

**Spatial- and Fourier-domain ptychography  
for high-throughput bio-imaging**

---

In the format provided by the  
authors and unedited

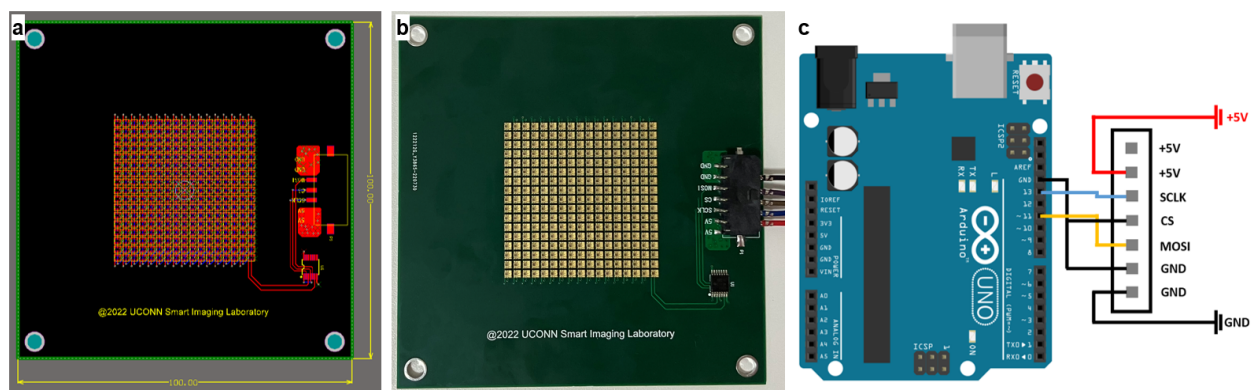

**Supplementary Figure 1 | The planar LED array with 17-by-17 LED elements.** (a) The design of the LED board. (b) The prototype of the LED array. (c) The wiring diagram of the LED array to the Arduino UNO board.

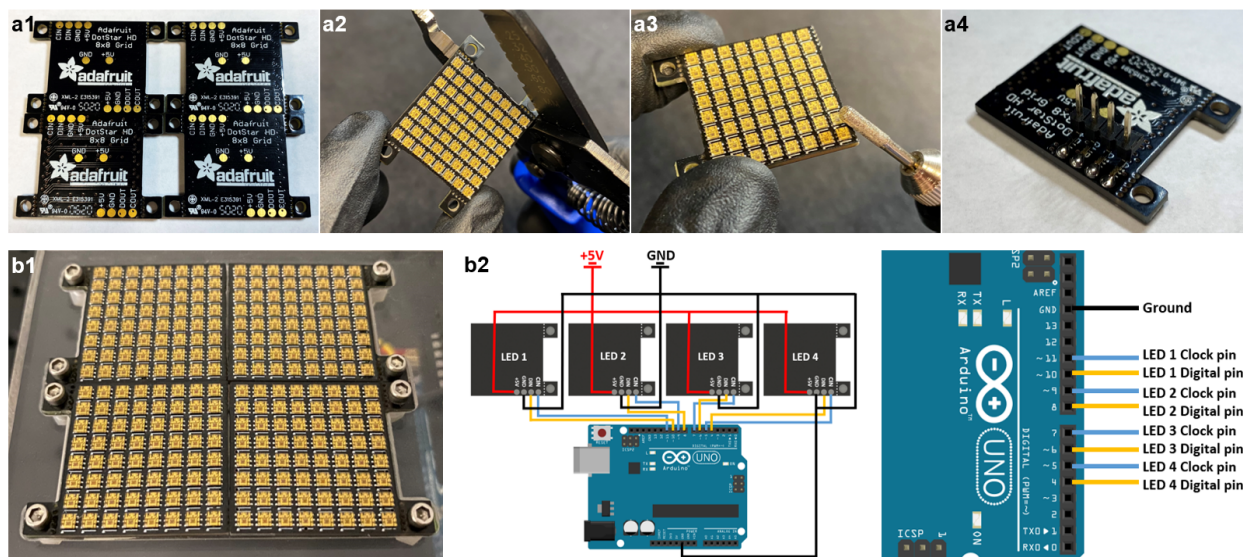

**Supplementary Figure 2 | Illuminator preparation for FP.** (a) The procedure for preparing 4 Adafruit Dotstar LED matrixes. (b1) The assembled planar LED array using the 4 LED matrixes. (b2) The wiring diagram of the planar LED array to the Arduino UNO board.

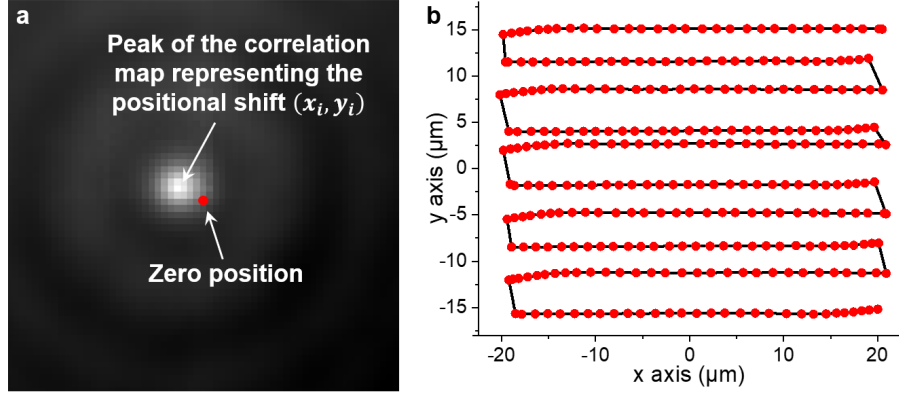

**Supplementary Figure 3 | Positional tracking for CP.** (a) The magnified view of the correlation map between the reference image and the measurement. (b) The estimated positional shifts of the coded sensor in a typical CP experiment.

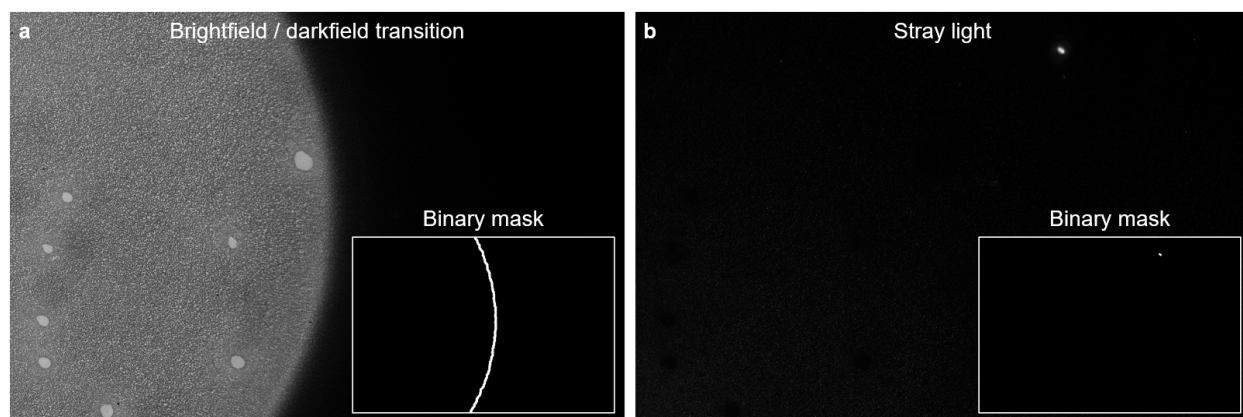

**Supplementary Figure 4 | Binary masks are generated to exclude certain regions of the captured images for FP reconstruction.** (a) A binary mask for excluding the brightfield-to-darkfield transition region. (b) A binary mask for excluding the region exposed to stray light.
