# Supplementary material for: Spatial- and Fourier-domain ptychography for high-throughput bio-imaging
Source: Springer Nature journal article supplement (doi:10.1038/s41596-023-00829-4), 2023-05-29
Supplement: MOESM4 [file 41596_2023_829_MOESM4_ESM41.zip]

## Sheet: LED
Comment	Designator	Footprint	Quantity
APA102-2020	D1_A1, D1_A2, D1_A3, D1_A4, D1_A5, D1_A6, D1_A7, D1_A8, D1_A9, D1_A10, D1_A11, D1_A12, D1_A13, D1_A14, D1_A15, D1_A16, D1_A17, D2_A1, D2_A2, D2_A3, D2_A4, D2_A5, D2_A6, D2_A7, D2_A8, D2_A9, D2_A10, D2_A11, D2_A12, D2_A13, D2_A14, D2_A15, D2_A16, D2_A17, D3_A1, D3_A2, D3_A3, D3_A4, D3_A5, D3_A6, D3_A7, D3_A8, D3_A9, D3_A10, D3_A11, D3_A12, D3_A13, D3_A14, D3_A15, D3_A16, D3_A17, D4_A1, D4_A2, D4_A…	LED	289
662107145021	P1	CON7	1
SN74AHCT125	U1	TSSOP-14_L5.0-W4.4-P0.65-LS6.4-BL	1
